# Supplementary material for: Disability and Adverse Effects of Oral Versus Long-Acting Injectable Antipsychotics in Schizophrenia-Spectrum and Bipolar Disorder: A Comparison Based on Data-Driven Taxonomy
Source: PubMed Central journal article supplement — Clin Drug Investig. 2024 Sep 20;44(9):715–27. doi: 10.1007/s40261-024-01391-x (PMC11455686; doi:10.1007/s40261-024-01391-x), 2024-09-20
Supplement: 40261_2024_1391_MOESM1_ESM.pdf [file 40261_2024_1391_MOESM1_ESM.pdf]

***Disability and side effects of oral versus long-acting injectable antipsychotics in schizophrenia spectrum and bipolar disorder: a comparison based on data-driven taxonomy***

**Clinical Drug Investigation**

Alessandro Rodolico \* <sup>1</sup>, Sofia Francesca Aprile \* <sup>2</sup>, Pierfelice Cutrufelli # <sup>1</sup>, Gabriele Privitera <sup>1</sup>, Sabrina Castellano <sup>2</sup>, Carmen Concerto <sup>1</sup>, Rosaria Furnari <sup>1</sup>, Claudia Savia Guerrera <sup>2</sup>, Ludovico Mineo <sup>1</sup>, Giuseppe Alessio Platania <sup>2</sup>, Antonino Petralia <sup>1</sup>, Filippo Caraci <sup>3,4</sup>, Maria Salvina Signorelli <sup>1,3</sup>

<sup>1</sup> Psychiatry Unit, Department of Clinical and Experimental Medicine, University of Catania, Via Santa Sofia 78, 95123 Catania, Italy

<sup>2</sup> Department of Educational Sciences, Section of Psychology, University of Catania, Via Teatro Greco 84, 95124 Catania, Italy

<sup>3</sup> Oasi Research Institute - IRCCS, Via Conte Ruggero 73, 94018 Troina, Italy

<sup>4</sup> Department of Drug and Health Sciences, Via Valdisavoia, 5, 95123 Catania University of Catania, Catania, Italy

\* Alessandro Rodolico and Sofia Francesca Aprile contributed equally to this work and share first authorship

# Pierfelice Cutrufelli pierfelicecutrufelli@yahoo.it is the corresponding author

**Table A1.** Correlation Matrix – Psychological Side Effects

|                            |                | WHODAS Total | Cognition | Mobility  | Selfcare | Getting along | Life activities | Participation |
|----------------------------|----------------|--------------|-----------|-----------|----------|---------------|-----------------|---------------|
| UKU_Total                  | Spearman's rho | 0.475 ***    | 0.386 *** | 0.281 **  | 0.275 ** | 0.364 ***     | 0.389 ***       | 0.479 ***     |
|                            | df             | 124          | 124       | 124       | 124      | 124           | 124             | 124           |
|                            | p-value        | < .001       | < .001    | 0.001     | 0.002    | < .001        | < .001          | < .001        |
|                            | N              | 126          | 126       | 126       | 126      | 126           | 126             | 126           |
| Psychological Side Effects | Spearman's rho | 0.484 ***    | 0.435 *** | 0.266 **  | 0.194 *  | 0.394 ***     | 0.421 ***       | 0.491 ***     |
|                            | df             | 124          | 124       | 124       | 124      | 124           | 124             | 124           |
|                            | p-value        | < .001       | < .001    | 0.003     | 0.030    | < .001        | < .001          | < .001        |
|                            | N              | 126          | 126       | 126       | 126      | 126           | 126             | 126           |
| UKU_1.1                    | Spearman's rho | 0.359 ***    | 0.436 *** | 0.216 *   | 0.157    | 0.314 ***     | 0.243 **        | 0.371 ***     |
|                            | df             | 124          | 124       | 124       | 124      | 124           | 124             | 124           |
|                            | p-value        | < .001       | < .001    | 0.015     | 0.078    | < .001        | 0.006           | < .001        |
|                            | N              | 126          | 126       | 126       | 126      | 126           | 126             | 126           |
| UKU_1.2                    | Spearman's rho | 0.316 ***    | 0.314 *** | 0.311 *** | 0.209 *  | 0.226 *       | 0.223 *         | 0.298 ***     |
|                            | df             | 124          | 124       | 124       | 124      | 124           | 124             | 124           |
|                            | p-value        | < .001       | < .001    | < .001    | 0.019    | 0.011         | 0.012           | < .001        |
|                            | N              | 126          | 126       | 126       | 126      | 126           | 126             | 126           |
| UKU_1.3                    | Spearman's rho | 0.223 *      | 0.200 *   | 0.212 *   | 0.093    | 0.015         | 0.162           | 0.233 **      |
|                            | df             | 124          | 124       | 124       | 124      | 124           | 124             | 124           |
|                            | p-value        | 0.012        | 0.025     | 0.017     | 0.298    | 0.870         | 0.070           | 0.009         |
|                            | N              | 126          | 126       | 126       | 126      | 126           | 126             | 126           |
| UKU_1.4                    | Spearman's rho | 0.277 **     | 0.306 *** | 0.231 **  | 0.230 ** | 0.237 **      | 0.187 *         | 0.254 **      |
|                            | df             | 124          | 124       | 124       | 124      | 124           | 124             | 124           |
|                            | p-value        | 0.002        | < .001    | 0.009     | 0.009    | 0.008         | 0.036           | 0.004         |
|                            | N              | 126          | 126       | 126       | 126      | 126           | 126             | 126           |
| UKU_1.5                    | Spearman's rho | 0.365 ***    | 0.354 *** | 0.176 *   | 0.251 ** | 0.333 ***     | 0.340 ***       | 0.258 **      |
|                            | df             | 124          | 124       | 124       | 124      | 124           | 124             | 124           |
|                            | p-value        | < .001       | < .001    | 0.048     | 0.005    | < .001        | < .001          | 0.003         |
|                            | N              | 126          | 126       | 126       | 126      | 126           | 126             | 126           |

|          |                | WHODAS Total | Cognition | Mobility | Selfcare | Getting along | Life activities | Participation |
|----------|----------------|--------------|-----------|----------|----------|---------------|-----------------|---------------|
| UKU_1.6  | Spearman's rho | 0.440 ***    | 0.376 *** | 0.161    | 0.121    | 0.379 ***     | 0.425 ***       | 0.462 ***     |
|          | df             | 124          | 124       | 124      | 124      | 124           | 124             | 124           |
|          | p-value        | < .001       | < .001    | 0.072    | 0.178    | < .001        | < .001          | < .001        |
|          | N              | 126          | 126       | 126      | 126      | 126           | 126             | 126           |
| UKU_1.7  | Spearman's rho | 0.061        | -0.001    | 0.019    | 0.050    | 0.001         | 0.064           | 0.102         |
|          | df             | 124          | 124       | 124      | 124      | 124           | 124             | 124           |
|          | p-value        | 0.494        | 0.993     | 0.835    | 0.577    | 0.994         | 0.474           | 0.257         |
|          | N              | 126          | 126       | 126      | 126      | 126           | 126             | 126           |
| UKU_1.8  | Spearman's rho | 0.146        | 0.156     | 0.031    | -0.031   | 0.106         | 0.154           | 0.130         |
|          | df             | 124          | 124       | 124      | 124      | 124           | 124             | 124           |
|          | p-value        | 0.103        | 0.081     | 0.733    | 0.734    | 0.237         | 0.085           | 0.148         |
|          | N              | 126          | 126       | 126      | 126      | 126           | 126             | 126           |
| UKU_1.9  | Spearman's rho | 0.141        | 0.027     | 0.076    | 0.015    | 0.154         | 0.196 *         | 0.118         |
|          | df             | 124          | 124       | 124      | 124      | 124           | 124             | 124           |
|          | p-value        | 0.114        | 0.764     | 0.397    | 0.865    | 0.086         | 0.028           | 0.188         |
|          | N              | 126          | 126       | 126      | 126      | 126           | 126             | 126           |
| UKU_1.10 | Spearman's rho | 0.169        | 0.148     | 0.070    | 0.155    | 0.202 *       | 0.019           | 0.194 *       |
|          | df             | 124          | 124       | 124      | 124      | 124           | 124             | 124           |
|          | p-value        | 0.059        | 0.099     | 0.438    | 0.084    | 0.024         | 0.829           | 0.029         |
|          | N              | 126          | 126       | 126      | 126      | 126           | 126             | 126           |

Note. \* p < .05, \*\* p < .01, \*\*\* p < .001

**Table A2.** Correlation Matrix – Neurological Side Effects

|                           |                | <b>WHODAS Total</b> | <b>Cognition</b> | <b>Mobility</b> | <b>Selfcare</b> | <b>Getting along</b> | <b>Life activies</b> | <b>Participation</b> |
|---------------------------|----------------|---------------------|------------------|-----------------|-----------------|----------------------|----------------------|----------------------|
| Neurological Side Effects | Spearman's rho | 0.282 **            | 0.277 **         | 0.266 **        | 0.236 **        | 0.154                | 0.215 *              | 0.215 *              |
|                           | df             | 124                 | 124              | 124             | 124             | 124                  | 124                  | 124                  |
|                           | p-value        | 0.001               | 0.002            | 0.003           | 0.008           | 0.085                | 0.015                | 0.016                |
|                           | N              | 126                 | 126              | 126             | 126             | 126                  | 126                  | 126                  |
| UKU_2.1                   | Spearman's rho | 0.187 *             | 0.206 *          | 0.197 *         | 0.167           | 0.030                | 0.149                | 0.151                |
|                           | df             | 124                 | 124              | 124             | 124             | 124                  | 124                  | 124                  |
|                           | p-value        | 0.036               | 0.020            | 0.027           | 0.062           | 0.742                | 0.096                | 0.092                |
|                           | N              | 126                 | 126              | 126             | 126             | 126                  | 126                  | 126                  |
| UKU_2.2                   | Spearman's rho | -0.026              | 0.069            | -0.112          | -0.045          | 0.099                | 0.071                | -0.039               |
|                           | df             | 124                 | 124              | 124             | 124             | 124                  | 124                  | 124                  |
|                           | p-value        | 0.769               | 0.440            | 0.211           | 0.619           | 0.270                | 0.432                | 0.661                |
|                           | N              | 126                 | 126              | 126             | 126             | 126                  | 126                  | 126                  |
| UKU_2.3                   | Spearman's rho | 0.227 *             | 0.240 **         | 0.199 *         | 0.284 **        | 0.229 **             | 0.152                | 0.111                |
|                           | df             | 124                 | 124              | 124             | 124             | 124                  | 124                  | 124                  |
|                           | p-value        | 0.011               | 0.007            | 0.025           | 0.001           | 0.010                | 0.090                | 0.216                |
|                           | N              | 126                 | 126              | 126             | 126             | 126                  | 126                  | 126                  |
| UKU_2.4                   | Spearman's rho | 0.200 *             | 0.212 *          | 0.167           | 0.087           | 0.133                | 0.222 *              | 0.102                |
|                           | df             | 124                 | 124              | 124             | 124             | 124                  | 124                  | 124                  |
|                           | p-value        | 0.025               | 0.017            | 0.062           | 0.332           | 0.137                | 0.013                | 0.258                |
|                           | N              | 126                 | 126              | 126             | 126             | 126                  | 126                  | 126                  |
| UKU_2.5                   | Spearman's rho | 0.116               | 0.077            | 0.086           | 0.067           | -0.048               | 0.056                | 0.106                |
|                           | df             | 124                 | 124              | 124             | 124             | 124                  | 124                  | 124                  |
|                           | p-value        | 0.198               | 0.392            | 0.341           | 0.459           | 0.594                | 0.536                | 0.237                |
|                           | N              | 126                 | 126              | 126             | 126             | 126                  | 126                  | 126                  |
| UKU_2.6                   | Spearman's rho | 0.235 **            | 0.226 *          | 0.231 **        | 0.151           | 0.192 *              | 0.159                | 0.160                |
|                           | df             | 124                 | 124              | 124             | 124             | 124                  | 124                  | 124                  |
|                           | p-value        | 0.008               | 0.011            | 0.009           | 0.091           | 0.031                | 0.076                | 0.073                |
|                           | N              | 126                 | 126              | 126             | 126             | 126                  | 126                  | 126                  |

|         |                | WHODAS Total | Cognition | Mobility | Selfcare | Getting along | Life activities | Participation |
|---------|----------------|--------------|-----------|----------|----------|---------------|-----------------|---------------|
| UKU_2.7 | Spearman's rho | -0.017       | -0.136    | -0.015   | 0.015    | -0.043        | 0.003           | 0.106         |
|         | df             | 124          | 124       | 124      | 124      | 124           | 124             | 124           |
|         | p-value        | 0.846        | 0.128     | 0.872    | 0.865    | 0.629         | 0.977           | 0.239         |
|         | N              | 126          | 126       | 126      | 126      | 126           | 126             | 126           |
| UKU_2.8 | Spearman's rho | 0.237 **     | 0.151     | 0.167    | 0.172    | 0.110         | 0.248 **        | 0.227 *       |
|         | df             | 124          | 124       | 124      | 124      | 124           | 124             | 124           |
|         | p-value        | 0.008        | 0.092     | 0.062    | 0.054    | 0.218         | 0.005           | 0.010         |
|         | N              | 126          | 126       | 126      | 126      | 126           | 126             | 126           |

Note. \* p < .05, \*\* p < .01, \*\*\* p < .001

**Table A3.** Correlation Matrix – Autonomic Side effects

|                        |                | WHODAS total | Cognition | Mobility | Selfcare | Getting along | Life activities | Participation |
|------------------------|----------------|--------------|-----------|----------|----------|---------------|-----------------|---------------|
| Autonomic Side Effects | Spearman's rho | 0.201 *      | 0.211 *   | 0.188 *  | 0.139    | 0.072         | 0.146           | 0.173         |
|                        | df             | 124          | 124       | 124      | 124      | 124           | 124             | 124           |
|                        | p-value        | 0.024        | 0.018     | 0.035    | 0.120    | 0.422         | 0.102           | 0.053         |
|                        | N              | 126          | 126       | 126      | 126      | 126           | 126             | 126           |
| UKU_3.1                | Spearman's rho | 0.112        | 0.228 *   | 0.116    | -0.009   | -0.040        | 0.102           | 0.118         |
|                        | df             | 124          | 124       | 124      | 124      | 124           | 124             | 124           |
|                        | p-value        | 0.212        | 0.010     | 0.196    | 0.924    | 0.657         | 0.257           | 0.189         |
|                        | N              | 126          | 126       | 126      | 126      | 126           | 126             | 126           |
| UKU_3.2                | Spearman's rho | 0.044        | 0.033     | 0.046    | -0.067   | 0.041         | 0.105           | -0.154        |
|                        | df             | 124          | 124       | 124      | 124      | 124           | 124             | 124           |
|                        | p-value        | 0.627        | 0.711     | 0.608    | 0.459    | 0.652         | 0.240           | 0.084         |
|                        | N              | 126          | 126       | 126      | 126      | 126           | 126             | 126           |

|           |                | <b>WHODAS total</b> | <b>Cognition</b> | <b>Mobility</b> | <b>Selfcare</b> | <b>Getting along</b> | <b>Life activities</b> | <b>Participation</b> |
|-----------|----------------|---------------------|------------------|-----------------|-----------------|----------------------|------------------------|----------------------|
| UKU_3.3   | Spearman's rho | 0.112               | 0.150            | 0.099           | 0.103           | 0.034                | 0.014                  | 0.166                |
|           | df             | 124                 | 124              | 124             | 124             | 124                  | 124                    | 124                  |
|           | p-value        | 0.210               | 0.093            | 0.270           | 0.252           | 0.701                | 0.876                  | 0.063                |
|           | N              | 126                 | 126              | 126             | 126             | 126                  | 126                    | 126                  |
| UKU_3.4   | Spearman's rho | 0.142               | 0.064            | 0.202 *         | 0.079           | 0.061                | 0.123                  | 0.137                |
|           | df             | 124                 | 124              | 124             | 124             | 124                  | 124                    | 124                  |
|           | p-value        | 0.114               | 0.477            | 0.024           | 0.377           | 0.497                | 0.169                  | 0.125                |
|           | N              | 126                 | 126              | 126             | 126             | 126                  | 126                    | 126                  |
| UKU_3.5   | Spearman's rho | 0.075               | 0.024            | 0.051           | 0.032           | 0.075                | 0.144                  | 0.090                |
|           | df             | 124                 | 124              | 124             | 124             | 124                  | 124                    | 124                  |
|           | p-value        | 0.406               | 0.792            | 0.568           | 0.726           | 0.405                | 0.107                  | 0.316                |
|           | N              | 126                 | 126              | 126             | 126             | 126                  | 126                    | 126                  |
| UKU_3.6   | Spearman's rho | -0.019              | 0.023            | -0.091          | 0.036           | -0.052               | -0.094                 | 0.026                |
|           | df             | 124                 | 124              | 124             | 124             | 124                  | 124                    | 124                  |
|           | p-value        | 0.834               | 0.798            | 0.308           | 0.686           | 0.562                | 0.296                  | 0.772                |
|           | N              | 126                 | 126              | 126             | 126             | 126                  | 126                    | 126                  |
| UKU_3.7   | Spearman's rho | -0.057              | -0.067           | 0.005           | 0.016           | -0.148               | 0.040                  | -0.053               |
|           | df             | 124                 | 124              | 124             | 124             | 124                  | 124                    | 124                  |
|           | p-value        | 0.524               | 0.457            | 0.957           | 0.858           | 0.097                | 0.659                  | 0.555                |
|           | N              | 126                 | 126              | 126             | 126             | 126                  | 126                    | 126                  |
| UKU_3.8.1 | Spearman's rho | 0.077               | 0.035            | 0.073           | 0.109           | 0.073                | 0.079                  | 0.056                |
|           | df             | 124                 | 124              | 124             | 124             | 124                  | 124                    | 124                  |
|           | p-value        | 0.392               | 0.698            | 0.418           | 0.226           | 0.419                | 0.381                  | 0.532                |
|           | N              | 126                 | 126              | 126             | 126             | 126                  | 126                    | 126                  |
| UKU_3.8.2 | Spearman's rho | 0.096               | 0.009            | 0.154           | 0.199 *         | 0.044                | 0.117                  | 0.007                |
|           | df             | 124                 | 124              | 124             | 124             | 124                  | 124                    | 124                  |
|           | p-value        | 0.286               | 0.922            | 0.085           | 0.025           | 0.624                | 0.190                  | 0.942                |
|           | N              | 126                 | 126              | 126             | 126             | 126                  | 126                    | 126                  |

|          |                | WHODAS total | Cognition | Mobility | Selfcare | Getting along | Life activities | Participation |
|----------|----------------|--------------|-----------|----------|----------|---------------|-----------------|---------------|
| UKU_3.9  | Spearman's rho | 0.071        | 0.072     | 0.046    | 0.095    | 0.053         | 0.061           | 0.119         |
|          | df             | 124          | 124       | 124      | 124      | 124           | 124             | 124           |
|          | p-value        | 0.428        | 0.426     | 0.613    | 0.289    | 0.558         | 0.501           | 0.183         |
|          | N              | 126          | 126       | 126      | 126      | 126           | 126             | 126           |
| UKU_3.10 | Spearman's rho | 0.269**      | 0.194*    | 0.181*   | 0.111    | 0.274**       | 0.214*          | 0.222*        |
|          | df             | 124          | 124       | 124      | 124      | 124           | 124             | 124           |
|          | p-value        | 0.002        | 0.029     | 0.043    | 0.218    | 0.002         | 0.016           | 0.012         |
|          | N              | 126          | 126       | 126      | 126      | 126           | 126             | 126           |
| UKU_3.11 | Spearman's rho | 0.070        | 0.106     | 0.036    | 0.012    | -0.019        | 0.016           | 0.078         |
|          | df             | 124          | 124       | 124      | 124      | 124           | 124             | 124           |
|          | p-value        | 0.433        | 0.236     | 0.688    | 0.898    | 0.832         | 0.855           | 0.388         |
|          | N              | 126          | 126       | 126      | 126      | 126           | 126             | 126           |

Note. \* p < .05, \*\* p < .01, \*\*\* p < .001

**Table A4.** Correlation Matrix – Other Side Effects

|                    |                | WHODAS Total | Cognition | Mobility | Selfcare | Getting along | Life activities | Participation |
|--------------------|----------------|--------------|-----------|----------|----------|---------------|-----------------|---------------|
| Other side effects | Spearman's rho | 0.241**      | 0.139     | 0.091    | 0.160    | 0.285**       | 0.186*          | 0.296***      |
|                    | df             | 124          | 124       | 124      | 124      | 124           | 124             | 124           |
|                    | p-value        | 0.007        | 0.122     | 0.309    | 0.073    | 0.001         | 0.037           | <.001         |
|                    | N              | 126          | 126       | 126      | 126      | 126           | 126             | 126           |
| UKU_4.1            | Spearman's rho | -0.110       | -0.074    | -0.087   | -0.087   | -0.055        | -0.084          | -0.162        |
|                    | df             | 124          | 124       | 124      | 124      | 124           | 124             | 124           |
|                    | p-value        | 0.221        | 0.411     | 0.333    | 0.331    | 0.544         | 0.349           | 0.071         |
|                    | N              | 126          | 126       | 126      | 126      | 126           | 126             | 126           |

|         |                | <b>WHODAS Total</b> | <b>Cognition</b> | <b>Mobility</b> | <b>Selfcare</b> | <b>Getting along</b> | <b>Life activities</b> | <b>Participation</b> |
|---------|----------------|---------------------|------------------|-----------------|-----------------|----------------------|------------------------|----------------------|
| UKU_4.2 | Spearman's rho | 0.035               | 0.048            | 0.011           | 0.063           | 0.015                | 0.074                  | -0.065               |
|         | df             | 124                 | 124              | 124             | 124             | 124                  | 124                    | 124                  |
|         | p-value        | 0.701               | 0.591            | 0.898           | 0.486           | 0.868                | 0.413                  | 0.466                |
|         | N              | 126                 | 126              | 126             | 126             | 126                  | 126                    | 126                  |
| UKU_4.3 | Spearman's rho | 0.130               | 0.160            | 0.081           | 0.134           | 0.046                | 0.016                  | 0.122                |
|         | df             | 124                 | 124              | 124             | 124             | 124                  | 124                    | 124                  |
|         | p-value        | 0.146               | 0.073            | 0.369           | 0.135           | 0.608                | 0.862                  | 0.172                |
|         | N              | 126                 | 126              | 126             | 126             | 126                  | 126                    | 126                  |
| UKU_4.4 | Spearman's rho | -0.154              | -0.070           | -0.116          | -0.073          | -0.139               | -0.032                 | -0.111               |
|         | df             | 124                 | 124              | 124             | 124             | 124                  | 124                    | 124                  |
|         | p-value        | 0.086               | 0.439            | 0.195           | 0.414           | 0.119                | 0.725                  | 0.215                |
|         | N              | 126                 | 126              | 126             | 126             | 126                  | 126                    | 126                  |
| UKU_4.5 | Spearman's rho | 0.106               | 0.058            | 0.095           | 0.052           | 0.074                | 0.111                  | 0.062                |
|         | df             | 124                 | 124              | 124             | 124             | 124                  | 124                    | 124                  |
|         | p-value        | 0.236               | 0.522            | 0.290           | 0.562           | 0.409                | 0.215                  | 0.487                |
|         | N              | 126                 | 126              | 126             | 126             | 126                  | 126                    | 126                  |
| UKU_4.6 | Spearman's rho | 0.028               | 0.037            | 0.012           | 0.107           | 0.066                | 0.040                  | 0.061                |
|         | df             | 124                 | 124              | 124             | 124             | 124                  | 124                    | 124                  |
|         | p-value        | 0.758               | 0.678            | 0.898           | 0.234           | 0.460                | 0.658                  | 0.498                |
|         | N              | 126                 | 126              | 126             | 126             | 126                  | 126                    | 126                  |
| UKU_4.7 | Spearman's rho | 0.015               | -0.023           | -0.050          | -0.064          | 0.120                | -0.032                 | 0.085                |
|         | df             | 124                 | 124              | 124             | 124             | 124                  | 124                    | 124                  |
|         | p-value        | 0.870               | 0.797            | 0.580           | 0.473           | 0.181                | 0.719                  | 0.342                |
|         | N              | 126                 | 126              | 126             | 126             | 126                  | 126                    | 126                  |
| UKU_4.8 | Spearman's rho | 0.058               | 0.031            | 0.000           | -0.024          | 0.084                | 0.104                  | 0.089                |
|         | df             | 124                 | 124              | 124             | 124             | 124                  | 124                    | 124                  |
|         | p-value        | 0.517               | 0.732            | 0.996           | 0.787           | 0.349                | 0.245                  | 0.321                |
|         | N              | 126                 | 126              | 126             | 126             | 126                  | 126                    | 126                  |



|            |                | WHODAS Total | Cognition | Mobility | Selfcare | Getting along | Life activities | Participation |
|------------|----------------|--------------|-----------|----------|----------|---------------|-----------------|---------------|
| UKU_4.9    | Spearman's rho | 0.061        | -0.062    | 0.053    | 0.086    | -0.047        | 0.082           | 0.121         |
|            | df             | 124          | 124       | 124      | 124      | 124           | 124             | 124           |
|            | p-value        | 0.497        | 0.493     | 0.557    | 0.338    | 0.601         | 0.362           | 0.178         |
|            | N              | 126          | 126       | 126      | 126      | 126           | 126             | 126           |
| UKU_4.10.1 | Spearman's rho | -0.006       | -0.033    | 0.003    | 0.052    | 0.066         | -0.014          | -0.026        |
|            | df             | 124          | 124       | 124      | 124      | 124           | 124             | 124           |
|            | p-value        | 0.946        | 0.712     | 0.975    | 0.566    | 0.463         | 0.876           | 0.774         |
|            | N              | 126          | 126       | 126      | 126      | 126           | 126             | 126           |
| UKU_4.10.2 | Spearman's rho | 0.064        | 0.002     | -0.002   | 0.033    | 0.059         | 0.067           | 0.099         |
|            | df             | 124          | 124       | 124      | 124      | 124           | 124             | 124           |
|            | p-value        | 0.475        | 0.986     | 0.984    | 0.711    | 0.511         | 0.455           | 0.269         |
|            | N              | 126          | 126       | 126      | 126      | 126           | 126             | 126           |
| UKU_4.11   | Spearman's rho | -0.110       | -0.048    | -0.070   | -0.088   | -0.067        | -0.112          | -0.105        |
|            | df             | 124          | 124       | 124      | 124      | 124           | 124             | 124           |
|            | p-value        | 0.222        | 0.593     | 0.439    | 0.328    | 0.455         | 0.211           | 0.243         |
|            | N              | 126          | 126       | 126      | 126      | 126           | 126             | 126           |
| UKU_4.12   | Spearman's rho | 0.316***     | 0.226*    | 0.127    | 0.143    | 0.321***      | 0.249**         | 0.390***      |
|            | df             | 124          | 124       | 124      | 124      | 124           | 124             | 124           |
|            | p-value        | <.001        | 0.011     | 0.156    | 0.110    | <.001         | 0.005           | <.001         |
|            | N              | 126          | 126       | 126      | 126      | 126           | 126             | 126           |
| UKU_4.13   | Spearman's rho | 0.146        | 0.046     | 0.008    | 0.146    | 0.171         | 0.100           | 0.177*        |
|            | df             | 124          | 124       | 124      | 124      | 124           | 124             | 124           |
|            | p-value        | 0.102        | 0.611     | 0.929    | 0.103    | 0.056         | 0.263           | 0.048         |
|            | N              | 126          | 126       | 126      | 126      | 126           | 126             | 126           |
| UKU_4.14   | Spearman's rho | 0.128        | 0.045     | 0.034    | 0.101    | 0.128         | 0.049           | 0.173         |
|            | df             | 124          | 124       | 124      | 124      | 124           | 124             | 124           |
|            | p-value        | 0.154        | 0.614     | 0.706    | 0.262    | 0.153         | 0.586           | 0.053         |
|            | N              | 126          | 126       | 126      | 126      | 126           | 126             | 126           |

|          |                | WHODAS Total | Cognition | Mobility | Selfcare | Getting along | Life activities | Participation |
|----------|----------------|--------------|-----------|----------|----------|---------------|-----------------|---------------|
| UKU_4.15 | Spearman's rho | 0.222 *      | 0.099     | 0.054    | 0.117    | 0.292 ***     | 0.195 *         | 0.238 **      |
|          | df             | 124          | 124       | 124      | 124      | 124           | 124             | 124           |
|          | p-value        | 0.013        | 0.268     | 0.552    | 0.191    | < .001        | 0.028           | 0.007         |
|          | N              | 126          | 126       | 126      | 126      | 126           | 126             | 126           |
| UKU_4.16 | Spearman's rho | 0.170        | 0.163     | 0.144    | 0.095    | 0.199 *       | 0.055           | 0.101         |
|          | df             | 124          | 124       | 124      | 124      | 124           | 124             | 124           |
|          | p-value        | 0.057        | 0.068     | 0.109    | 0.292    | 0.026         | 0.544           | 0.259         |
|          | N              | 126          | 126       | 126      | 126      | 126           | 126             | 126           |
| UKU_4.17 | Spearman's rho | 0.081        | 0.058     | 0.083    | 0.101    | 0.046         | 0.034           | 0.068         |
|          | df             | 124          | 124       | 124      | 124      | 124           | 124             | 124           |
|          | p-value        | 0.366        | 0.520     | 0.358    | 0.258    | 0.608         | 0.708           | 0.450         |
|          | N              | 126          | 126       | 126      | 126      | 126           | 126             | 126           |

Note. \* p < .05, \*\* p < .01, \*\*\* p < .001

**Table A5.** Correlation Matrix – Sexual Side Effects

|                     |                | WHODAS Total | Cognition | Mobility | Selfcare | Getting along | Life activities | Participation |
|---------------------|----------------|--------------|-----------|----------|----------|---------------|-----------------|---------------|
| Sexual Side Effects | Spearman's rho | 0.265 **     | 0.153     | 0.076    | 0.107    | 0.307 ***     | 0.208 *         | 0.361 ***     |
|                     | df             | 124          | 124       | 124      | 124      | 124           | 124             | 124           |
|                     | p-value        | 0.003        | 0.086     | 0.400    | 0.234    | < .001        | 0.019           | < .001        |
|                     | N              | 126          | 126       | 126      | 126      | 126           | 126             | 126           |

Note. \* p < .05, \*\* p < .01, \*\*\* p < .001

**Table B1.** Partial Correlation – Psychological Side Effects

|           |                | WHODAS Total | Cognition | Mobility | Selfcare | Getting along | Life activities | Participation |
|-----------|----------------|--------------|-----------|----------|----------|---------------|-----------------|---------------|
| UKU_Total | Spearman's rho | 0.456 ***    | 0.376 *** | 0.233 *  | 0.255 ** | 0.368 ***     | 0.345 ***       | 0.437 ***     |

|                            |                | WHODAS Total | Cognition | Mobility | Selfcare | Getting along | Life activities | Participation |
|----------------------------|----------------|--------------|-----------|----------|----------|---------------|-----------------|---------------|
|                            | p-value        | < .001       | < .001    | 0.012    | 0.006    | < .001        | < .001          | < .001        |
|                            | N              | 126          | 126       | 126      | 126      | 126           | 126             | 126           |
| Psychological Side Effects | Spearman's rho | 0.488 ***    | 0.443 *** | 0.247 ** | 0.181    | 0.421 ***     | 0.405 ***       | 0.458 ***     |
|                            | p-value        | < .001       | < .001    | 0.008    | 0.051    | < .001        | < .001          | < .001        |
|                            | N              | 126          | 126       | 126      | 126      | 126           | 126             | 126           |
| UKU_1.1                    | Spearman's rho | 0.387 ***    | 0.470 *** | 0.239 ** | 0.179    | 0.335 ***     | 0.251 **        | 0.359 ***     |
|                            | p-value        | < .001       | < .001    | 0.010    | 0.055    | < .001        | 0.007           | < .001        |
|                            | N              | 126          | 126       | 126      | 126      | 126           | 126             | 126           |
| UKU_1.2                    | Spearman's rho | 0.303 ***    | 0.300 **  | 0.292 ** | 0.189 *  | 0.230 *       | 0.204 *         | 0.290 **      |
|                            | p-value        | < .001       | 0.001     | 0.001    | 0.043    | 0.013         | 0.028           | 0.002         |
|                            | N              | 126          | 126       | 126      | 126      | 126           | 126             | 126           |
| UKU_1.3                    | Spearman's rho | 0.171        | 0.175     | 0.150    | 0.036    | -0.000        | 0.117           | 0.190 *       |
|                            | p-value        | 0.066        | 0.060     | 0.109    | 0.699    | 0.999         | 0.211           | 0.041         |
|                            | N              | 126          | 126       | 126      | 126      | 126           | 126             | 126           |
| UKU_1.4                    | Spearman's rho | 0.248 **     | 0.302 *** | 0.212 *  | 0.183 *  | 0.232 *       | 0.150           | 0.221 *       |
|                            | p-value        | 0.007        | < .001    | 0.022    | 0.049    | 0.012         | 0.108           | 0.017         |
|                            | N              | 126          | 126       | 126      | 126      | 126           | 126             | 126           |
| UKU_1.5                    | Spearman's rho | 0.386 ***    | 0.358 *** | 0.180    | 0.294 ** | 0.333 ***     | 0.336 ***       | 0.239 **      |
|                            | p-value        | < .001       | < .001    | 0.053    | 0.001    | < .001        | < .001          | 0.010         |
|                            | N              | 126          | 126       | 126      | 126      | 126           | 126             | 126           |
| UKU_1.6                    | Spearman's rho | 0.452 ***    | 0.372 *** | 0.151    | 0.108    | 0.395 ***     | 0.420 ***       | 0.433 ***     |
|                            | p-value        | < .001       | < .001    | 0.107    | 0.250    | < .001        | < .001          | < .001        |
|                            | N              | 126          | 126       | 126      | 126      | 126           | 126             | 126           |
| UKU_1.7                    | Spearman's rho | 0.002        | -0.047    | -0.029   | -0.002   | -0.030        | 0.026           | 0.029         |
|                            | p-value        | 0.986        | 0.613     | 0.761    | 0.980    | 0.750         | 0.783           | 0.756         |
|                            | N              | 126          | 126       | 126      | 126      | 126           | 126             | 126           |
| UKU_1.8                    | Spearman's rho | 0.134        | 0.148     | 0.005    | -0.030   | 0.111         | 0.099           | 0.104         |

|          |                | WHODAS Total | Cognition | Mobility | Selfcare | Getting along | Life activities | Participation |
|----------|----------------|--------------|-----------|----------|----------|---------------|-----------------|---------------|
| UKU_1.9  | p-value        | 0.152        | 0.113     | 0.953    | 0.747    | 0.238         | 0.291           | 0.267         |
|          | N              | 126          | 126       | 126      | 126      | 126           | 126             | 126           |
|          | Spearman's rho | 0.132        | 0.011     | 0.052    | 0.007    | 0.163         | 0.203 *         | 0.111         |
|          | p-value        | 0.158        | 0.905     | 0.576    | 0.941    | 0.081         | 0.028           | 0.236         |
|          | N              | 126          | 126       | 126      | 126      | 126           | 126             | 126           |
|          | Spearman's rho | 0.129        | 0.119     | 0.010    | 0.148    | 0.176         | -0.012          | 0.151         |
| UKU_1.10 | p-value        | 0.169        | 0.205     | 0.918    | 0.113    | 0.059         | 0.902           | 0.105         |
|          | N              | 126          | 126       | 126      | 126      | 126           | 126             | 126           |
|          | Spearman's rho | 0.129        | 0.119     | 0.010    | 0.148    | 0.176         | -0.012          | 0.151         |

Note. controlling for 'Age', 'Sex', 'Smoking', 'Antipsychotic administration', 'Diagnosis', 'Children', 'Educational status', 'Family history', 'Substance misuse', and 'Group of drug'

Note. \* p < .05, \*\* p < .01, \*\*\* p < .001

**Table B2.** Partial Correlation – Neurological Side Effects

|                           |                | WHODAS Total | Cognition | Mobility | Selfcare | Getting along | Life activities | Participation |
|---------------------------|----------------|--------------|-----------|----------|----------|---------------|-----------------|---------------|
| Neurological Side Effects | Spearman's rho | 0.185 *      | 0.232 *   | 0.167    | 0.138    | 0.119         | 0.131           | 0.120         |
|                           | p-value        | 0.046        | 0.012     | 0.073    | 0.141    | 0.202         | 0.161           | 0.199         |
|                           | N              | 126          | 126       | 126      | 126      | 126           | 126             | 126           |
| UKU_2.1                   | Spearman's rho | 0.165        | 0.206 *   | 0.207 *  | 0.146    | 0.005         | 0.105           | 0.114         |
|                           | p-value        | 0.076        | 0.026     | 0.025    | 0.118    | 0.961         | 0.264           | 0.225         |
|                           | N              | 126          | 126       | 126      | 126      | 126           | 126             | 126           |
| UKU_2.2                   | Spearman's rho | -0.046       | 0.051     | -0.149   | -0.060   | 0.102         | 0.059           | -0.047        |
|                           | p-value        | 0.623        | 0.590     | 0.110    | 0.523    | 0.277         | 0.527           | 0.614         |
|                           | N              | 126          | 126       | 126      | 126      | 126           | 126             | 126           |
| UKU_2.3                   | Spearman's rho | 0.177        | 0.204 *   | 0.147    | 0.267 ** | 0.236 *       | 0.092           | 0.050         |
|                           | p-value        | 0.057        | 0.028     | 0.116    | 0.004    | 0.011         | 0.323           | 0.594         |
|                           | N              | 126          | 126       | 126      | 126      | 126           | 126             | 126           |
| UKU_2.4                   | Spearman's rho | 0.180        | 0.200 *   | 0.149    | 0.044    | 0.113         | 0.202 *         | 0.074         |

|         |                | WHODAS Total | Cognition | Mobility | Selfcare | Getting along | Life activities | Participation |
|---------|----------------|--------------|-----------|----------|----------|---------------|-----------------|---------------|
|         | p-value        | 0.053        | 0.031     | 0.111    | 0.642    | 0.226         | 0.030           | 0.429         |
|         | N              | 126          | 126       | 126      | 126      | 126           | 126             | 126           |
| UKU_2.5 | Spearman's rho | 0.043        | 0.047     | -0.025   | -0.048   | -0.084        | 0.015           | 0.080         |
|         | p-value        | 0.646        | 0.615     | 0.789    | 0.609    | 0.372         | 0.871           | 0.392         |
|         | N              | 126          | 126       | 126      | 126      | 126           | 126             | 126           |
| UKU_2.6 | Spearman's rho | 0.208 *      | 0.237 *   | 0.204 *  | 0.107    | 0.196 *       | 0.136           | 0.129         |
|         | p-value        | 0.025        | 0.010     | 0.028    | 0.253    | 0.035         | 0.146           | 0.169         |
|         | N              | 126          | 126       | 126      | 126      | 126           | 126             | 126           |
| UKU_2.7 | Spearman's rho | -0.028       | -0.163    | -0.021   | 0.038    | -0.078        | -0.017          | 0.068         |
|         | p-value        | 0.764        | 0.080     | 0.823    | 0.686    | 0.406         | 0.854           | 0.467         |
|         | N              | 126          | 126       | 126      | 126      | 126           | 126             | 126           |
| UKU_2.8 | Spearman's rho | 0.179        | 0.119     | 0.118    | 0.114    | 0.062         | 0.193 *         | 0.159         |
|         | p-value        | 0.054        | 0.203     | 0.206    | 0.222    | 0.506         | 0.038           | 0.089         |
|         | N              | 126          | 126       | 126      | 126      | 126           | 126             | 126           |

Note. controlling for 'Age', 'Sex', 'Smoking', 'Antipsychotic administration', 'Diagnosis', 'Children', 'Educational status', 'Family history', 'Substance misuse', and 'Group of drug'

Note. \* p < .05, \*\* p < .01, \*\*\* p < .001

**Table B3.** Partial Correlation – Autonomic Side Effects

|                        |                | WHODAS total | Cognition | Mobility | Selfcare | Getting along | Life activities | Participation |
|------------------------|----------------|--------------|-----------|----------|----------|---------------|-----------------|---------------|
| Autonomic Side Effects | Spearman's rho | 0.145        | 0.180     | 0.125    | 0.097    | 0.063         | 0.090           | 0.109         |
|                        | p-value        | 0.120        | 0.054     | 0.181    | 0.299    | 0.501         | 0.339           | 0.243         |
|                        | N              | 126          | 126       | 126      | 126      | 126           | 126             | 126           |
| UKU_3.1                | Spearman's rho | 0.038        | 0.195 *   | 0.036    | -0.064   | -0.074        | 0.043           | 0.036         |
|                        | p-value        | 0.687        | 0.036     | 0.704    | 0.497    | 0.428         | 0.650           | 0.702         |
|                        | N              | 126          | 126       | 126      | 126      | 126           | 126             | 126           |

|           |                | <b>WHODAS total</b> | <b>Cognition</b> | <b>Mobility</b> | <b>Selfcare</b> | <b>Getting along</b> | <b>Life activities</b> | <b>Participation</b> |
|-----------|----------------|---------------------|------------------|-----------------|-----------------|----------------------|------------------------|----------------------|
| UKU_3.2   | Spearman's rho | 0.011               | 0.015            | -0.028          | -0.115          | 0.067                | 0.108                  | -0.164               |
|           | p-value        | 0.907               | 0.873            | 0.761           | 0.219           | 0.475                | 0.249                  | 0.078                |
|           | N              | 126                 | 126              | 126             | 126             | 126                  | 126                    | 126                  |
| UKU_3.3   | Spearman's rho | 0.128               | 0.167            | 0.123           | 0.104           | 0.060                | -0.006                 | 0.179                |
|           | p-value        | 0.170               | 0.074            | 0.188           | 0.265           | 0.520                | 0.952                  | 0.055                |
|           | N              | 126                 | 126              | 126             | 126             | 126                  | 126                    | 126                  |
| UKU_3.4   | Spearman's rho | 0.087               | 0.025            | 0.160           | 0.058           | -0.002               | 0.078                  | 0.069                |
|           | p-value        | 0.352               | 0.790            | 0.087           | 0.536           | 0.983                | 0.406                  | 0.464                |
|           | N              | 126                 | 126              | 126             | 126             | 126                  | 126                    | 126                  |
| UKU_3.5   | Spearman's rho | 0.049               | 0.007            | 0.022           | -0.001          | 0.066                | 0.150                  | 0.073                |
|           | p-value        | 0.599               | 0.942            | 0.819           | 0.994           | 0.480                | 0.108                  | 0.433                |
|           | N              | 126                 | 126              | 126             | 126             | 126                  | 126                    | 126                  |
| UKU_3.6   | Spearman's rho | -0.024              | 0.011            | -0.116          | 0.082           | -0.017               | -0.135                 | 0.023                |
|           | p-value        | 0.798               | 0.905            | 0.214           | 0.384           | 0.852                | 0.150                  | 0.806                |
|           | N              | 126                 | 126              | 126             | 126             | 126                  | 126                    | 126                  |
| UKU_3.7   | Spearman's rho | -0.070              | -0.073           | -0.002          | 0.019           | -0.137               | 0.017                  | -0.046               |
|           | p-value        | 0.458               | 0.439            | 0.987           | 0.839           | 0.142                | 0.860                  | 0.625                |
|           | N              | 126                 | 126              | 126             | 126             | 126                  | 126                    | 126                  |
| UKU_3.8.1 | Spearman's rho | 0.057               | 0.027            | 0.066           | 0.087           | 0.059                | 0.059                  | -0.010               |
|           | p-value        | 0.545               | 0.774            | 0.480           | 0.351           | 0.527                | 0.532                  | 0.917                |
|           | N              | 126                 | 126              | 126             | 126             | 126                  | 126                    | 126                  |
| UKU_3.8.2 | Spearman's rho | 0.067               | -0.007           | 0.148           | 0.155           | 0.034                | 0.124                  | -0.054               |
|           | p-value        | 0.478               | 0.944            | 0.114           | 0.096           | 0.715                | 0.184                  | 0.568                |
|           | N              | 126                 | 126              | 126             | 126             | 126                  | 126                    | 126                  |
| UKU_3.9   | Spearman's rho | 0.037               | 0.064            | 0.020           | 0.044           | 0.031                | 0.043                  | 0.090                |
|           | p-value        | 0.694               | 0.492            | 0.833           | 0.637           | 0.738                | 0.645                  | 0.339                |
|           | N              | 126                 | 126              | 126             | 126             | 126                  | 126                    | 126                  |

|          |                | <b>WHODAS total</b> | <b>Cognition</b> | <b>Mobility</b> | <b>Selfcare</b> | <b>Getting along</b> | <b>Life activities</b> | <b>Participation</b> |
|----------|----------------|---------------------|------------------|-----------------|-----------------|----------------------|------------------------|----------------------|
| UKU_3.10 | Spearman's rho | 0.262 **            | 0.182            | 0.169           | 0.083           | 0.261 **             | 0.202 *                | 0.210 *              |
|          | p-value        | 0.005               | 0.051            | 0.070           | 0.374           | 0.005                | 0.030                  | 0.023                |
|          | N              | 126                 | 126              | 126             | 126             | 126                  | 126                    | 126                  |
| UKU_3.11 | Spearman's rho | 0.094               | 0.114            | 0.075           | 0.017           | -0.026               | -0.001                 | 0.088                |
|          | p-value        | 0.318               | 0.224            | 0.423           | 0.855           | 0.785                | 0.989                  | 0.347                |
|          | N              | 126                 | 126              | 126             | 126             | 126                  | 126                    | 126                  |

Note. controlling for 'Age', 'Sex', 'Smoking', 'Antipsychotic administration', 'Diagnosis', 'Children', 'Educational status', 'Family history', 'Substance misuse', and 'Group of drug'  
Note. \* p < .05, \*\* p < .01, \*\*\* p < .001

**Table B4.** Partial Correlation – Other Side Effects

|                    |                | <b>WHODAS total</b> | <b>Cognition</b> | <b>Mobility</b> | <b>Selfcare</b> | <b>Getting along</b> | <b>Life activities</b> | <b>Participation</b> |
|--------------------|----------------|---------------------|------------------|-----------------|-----------------|----------------------|------------------------|----------------------|
| Other side effects | Spearman's rho | 0.249 **            | 0.140            | 0.085           | 0.207 *         | 0.277 **             | 0.151                  | 0.258 **             |
|                    | p-value        | 0.007               | 0.134            | 0.365           | 0.026           | 0.003                | 0.105                  | 0.005                |
|                    | N              | 126                 | 126              | 126             | 126             | 126                  | 126                    | 126                  |
| UKU_4.1            | Spearman's rho | -0.094              | -0.061           | -0.066          | -0.090          | -0.054               | -0.104                 | -0.145               |
|                    | p-value        | 0.316               | 0.518            | 0.482           | 0.337           | 0.566                | 0.264                  | 0.120                |
|                    | N              | 126                 | 126              | 126             | 126             | 126                  | 126                    | 126                  |
| UKU_4.2            | Spearman's rho | -0.042              | 0.014            | -0.069          | 0.002           | -0.018               | 0.025                  | -0.168               |
|                    | p-value        | 0.656               | 0.885            | 0.459           | 0.983           | 0.850                | 0.792                  | 0.072                |
|                    | N              | 126                 | 126              | 126             | 126             | 126                  | 126                    | 126                  |
| UKU_4.3            | Spearman's rho | 0.079               | 0.123            | 0.032           | 0.097           | 0.026                | -0.050                 | 0.084                |
|                    | p-value        | 0.402               | 0.189            | 0.729           | 0.298           | 0.779                | 0.591                  | 0.368                |
|                    | N              | 126                 | 126              | 126             | 126             | 126                  | 126                    | 126                  |
| UKU_4.4            | Spearman's rho | -0.145              | -0.068           | -0.096          | -0.068          | -0.137               | 0.003                  | -0.126               |
|                    | p-value        | 0.121               | 0.466            | 0.304           | 0.467           | 0.142                | 0.976                  | 0.178                |

|            |                | WHODAS total | Cognition | Mobility | Selfcare | Getting along | Life activities | Participation |
|------------|----------------|--------------|-----------|----------|----------|---------------|-----------------|---------------|
|            | N              | 126          | 126       | 126      | 126      | 126           | 126             | 126           |
| UKU_4.5    | Spearman's rho | 0.074        | 0.026     | 0.039    | 0.032    | 0.027         | 0.085           | 0.050         |
|            | p-value        | 0.431        | 0.785     | 0.679    | 0.730    | 0.776         | 0.363           | 0.594         |
|            | N              | 126          | 126       | 126      | 126      | 126           | 126             | 126           |
| UKU_4.6    | Spearman's rho | 0.071        | 0.066     | 0.084    | 0.190 *  | 0.094         | 0.052           | 0.055         |
|            | p-value        | 0.452        | 0.480     | 0.372    | 0.041    | 0.314         | 0.576           | 0.556         |
|            | N              | 126          | 126       | 126      | 126      | 126           | 126             | 126           |
| UKU_4.7    | Spearman's rho | 0.000        | -0.051    | -0.095   | -0.041   | 0.095         | -0.062          | 0.084         |
|            | p-value        | 0.997        | 0.587     | 0.311    | 0.658    | 0.308         | 0.511           | 0.369         |
|            | N              | 126          | 126       | 126      | 126      | 126           | 126             | 126           |
| UKU_4.8    | Spearman's rho | 0.060        | 0.014     | -0.009   | 0.033    | 0.083         | 0.106           | 0.045         |
|            | p-value        | 0.522        | 0.882     | 0.922    | 0.721    | 0.376         | 0.260           | 0.632         |
|            | N              | 126          | 126       | 126      | 126      | 126           | 126             | 126           |
| UKU_4.9    | Spearman's rho | 0.072        | -0.064    | 0.087    | 0.114    | -0.077        | 0.081           | 0.071         |
|            | p-value        | 0.445        | 0.494     | 0.351    | 0.225    | 0.414         | 0.388           | 0.446         |
|            | N              | 126          | 126       | 126      | 126      | 126           | 126             | 126           |
| UKU_4.10.1 | Spearman's rho | -0.019       | -0.053    | -0.017   | 0.042    | 0.064         | -0.039          | -0.034        |
|            | p-value        | 0.837        | 0.570     | 0.857    | 0.655    | 0.495         | 0.679           | 0.721         |
|            | N              | 126          | 126       | 126      | 126      | 126           | 126             | 126           |
| UKU_4.10.2 | Spearman's rho | 0.034        | -0.034    | -0.054   | 0.004    | 0.046         | 0.043           | 0.068         |
|            | p-value        | 0.714        | 0.716     | 0.565    | 0.967    | 0.624         | 0.649           | 0.471         |
|            | N              | 126          | 126       | 126      | 126      | 126           | 126             | 126           |
| UKU_4.11   | Spearman's rho | -0.105       | -0.059    | -0.048   | -0.108   | -0.095        | -0.120          | -0.108        |
|            | p-value        | 0.261        | 0.531     | 0.606    | 0.250    | 0.309         | 0.198           | 0.250         |
|            | N              | 126          | 126       | 126      | 126      | 126           | 126             | 126           |
| UKU_4.12   | Spearman's rho | 0.363 ***    | 0.273 **  | 0.182 *  | 0.209 *  | 0.342 ***     | 0.246 **        | 0.390 ***     |
|            | p-value        | < .001       | 0.003     | 0.050    | 0.024    | < .001        | 0.008           | < .001        |



|          |                | WHODAS total | Cognition | Mobility | Selfcare | Getting along | Life activities | Participation |
|----------|----------------|--------------|-----------|----------|----------|---------------|-----------------|---------------|
|          | N              | 126          | 126       | 126      | 126      | 126           | 126             | 126           |
| UKU_4.13 | Spearman's rho | 0.206 *      | 0.090     | 0.060    | 0.163    | 0.183 *       | 0.151           | 0.236 *       |
|          | p-value        | 0.027        | 0.335     | 0.521    | 0.080    | 0.049         | 0.106           | 0.011         |
|          | N              | 126          | 126       | 126      | 126      | 126           | 126             | 126           |
| UKU_4.14 | Spearman's rho | 0.221 *      | 0.112     | 0.125    | 0.156    | 0.147         | 0.113           | 0.262 **      |
|          | p-value        | 0.017        | 0.230     | 0.181    | 0.093    | 0.116         | 0.229           | 0.004         |
|          | N              | 126          | 126       | 126      | 126      | 126           | 126             | 126           |
| UKU_4.15 | Spearman's rho | 0.235 *      | 0.123     | 0.036    | 0.152    | 0.317 ***     | 0.179           | 0.251 **      |
|          | p-value        | 0.011        | 0.188     | 0.704    | 0.104    | <.001         | 0.055           | 0.007         |
|          | N              | 126          | 126       | 126      | 126      | 126           | 126             | 126           |
| UKU_4.16 | Spearman's rho | 0.148        | 0.157     | 0.100    | 0.120    | 0.196 *       | 0.008           | 0.074         |
|          | p-value        | 0.114        | 0.092     | 0.284    | 0.200    | 0.035         | 0.933           | 0.427         |
|          | N              | 126          | 126       | 126      | 126      | 126           | 126             | 126           |
| UKU_4.17 | Spearman's rho | 0.104        | 0.066     | 0.109    | 0.124    | 0.043         | 0.049           | 0.065         |
|          | p-value        | 0.265        | 0.481     | 0.244    | 0.186    | 0.649         | 0.599           | 0.491         |
|          | N              | 126          | 126       | 126      | 126      | 126           | 126             | 126           |

Note. controlling for 'Age', 'Sex', 'Smoking', 'Antipsychotic administration', 'Diagnosis', 'Children', 'Educational status', 'Family history', 'Substance misuse', and 'Group of drug'  
Note. \* p < .05, \*\* p < .01, \*\*\* p < .001

**Table B5.** Partial Correlation – Sexual Side Effects

|                     |                | WHODAS total | Cognition | Mobility | Selfcare | Getting along | Life activities | Participation |
|---------------------|----------------|--------------|-----------|----------|----------|---------------|-----------------|---------------|
| Sexual Side Effects | Spearman's rho | 0.315 ***    | 0.184 *   | 0.120    | 0.180    | 0.317 ***     | 0.202 *         | 0.356 ***     |
|                     | p-value        | <.001        | 0.048     | 0.199    | 0.053    | <.001         | 0.030           | <.001         |
|                     | N              | 126          | 126       | 126      | 126      | 126           | 126             | 126           |

Note. controlling for 'Age', 'Sex', 'Smoking', 'Antipsychotic administration', 'Diagnosis', 'Children', 'Educational status', 'Family history', 'Substance misuse', and 'Group of drug'  
Note. \* p < .05, \*\* p < .01, \*\*\* p < .001

**Table C1.** Group comparison - Sex

|                            |                | <b>Statistic</b> | <b>P</b> | <b>Mean difference</b> | <b>SE difference</b>      | <b>Effect Size</b> |
|----------------------------|----------------|------------------|----------|------------------------|---------------------------|--------------------|
| Total Side Effects         | Mann-Whitney U | 1301             | 0.002    | 4.0000                 | Rank biserial correlation | 0.3308             |
| Psychological Side Effects | Mann-Whitney U | 1302             | 0.001    | 2.0000                 | Rank biserial correlation | 0.3302             |
| Neurological Side Effects  | Mann-Whitney U | 1485             | 0.020    | 1.0000                 | Rank biserial correlation | 0.2361             |
| Autonomic Side Effects     | Mann-Whitney U | 1445             | 0.013    | 1.0001                 | Rank biserial correlation | 0.2567             |
| Other side effects         | Mann-Whitney U | 1544             | 0.047    | 1.0000                 | Rank biserial correlation | 0.2060             |
| Sexual Side Effects        | Mann-Whitney U | 1677             | 0.170    | 1.77e-5                | Rank biserial correlation | 0.1373             |
| WHODAS total               | Mann-Whitney U | 1638             | 0.132    | 0.0500                 | Rank biserial correlation | 0.1574             |
| Cognition                  | Mann-Whitney U | 1682             | 0.194    | 0.0333                 | Rank biserial correlation | 0.1348             |
| Mobility                   | Mann-Whitney U | 1603             | 0.090    | 0.1000                 | Rank biserial correlation | 0.1757             |
| Self-care                  | Mann-Whitney U | 1859             | 0.666    | 2.59e-6                | Rank biserial correlation | 0.0437             |
| Getting along              | Mann-Whitney U | 1855             | 0.655    | 5.91e-5                | Rank biserial correlation | 0.0460             |
| Life activities            | Mann-Whitney U | 1681             | 0.192    | 0.0501                 | Rank biserial correlation | 0.1353             |
| Participation              | Mann-Whitney U | 1567             | 0.063    | 0.0937                 | Rank biserial correlation | 0.1939             |

Note.  $H_a \mu_{\text{female}} \neq \mu_{\text{male}}$

#### Group Descriptives

|                            | <b>Group</b> | <b>N</b> | <b>Mean</b> | <b>Median</b> | <b>SD</b> | <b>SE</b> |
|----------------------------|--------------|----------|-------------|---------------|-----------|-----------|
| Total Side Effects         | female       | 54       | 17.667      | 15.000        | 10.096    | 1.3739    |
|                            | male         | 72       | 12.361      | 11.000        | 7.249     | 0.8543    |
| Psychological Side Effects | female       | 54       | 6.593       | 5.500         | 5.268     | 0.7169    |
|                            | male         | 72       | 3.847       | 3.000         | 3.266     | 0.3849    |
| Neurological Side Effects  | female       | 54       | 2.074       | 2.000         | 1.941     | 0.2642    |
|                            | male         | 72       | 1.264       | 1.000         | 1.463     | 0.1724    |
| Autonomic Side Effects     | female       | 54       | 4.630       | 4.500         | 3.252     | 0.4426    |
|                            | male         | 72       | 3.292       | 3.000         | 2.537     | 0.2990    |
| Other side effects         | female       | 54       | 4.370       | 4.000         | 2.980     | 0.4055    |
|                            | male         | 72       | 3.472       | 3.000         | 3.076     | 0.3626    |
| Sexual Side Effects        | female       | 54       | 2.056       | 2.000         | 2.210     | 0.3007    |
|                            | male         | 72       | 2.236       | 0.500         | 3.523     | 0.4151    |
| WHODAS total               | female       | 54       | 0.391       | 0.367         | 0.193     | 0.0262    |
|                            | male         | 72       | 0.343       | 0.300         | 0.188     | 0.0222    |

## Group Descriptives

|                 | Group  | N  | Mean  | Median | SD    | SE     |
|-----------------|--------|----|-------|--------|-------|--------|
| Cognition       | female | 54 | 0.394 | 0.317  | 0.267 | 0.0364 |
|                 | male   | 72 | 0.343 | 0.292  | 0.222 | 0.0262 |
| Mobility        | female | 54 | 0.391 | 0.400  | 0.254 | 0.0346 |
|                 | male   | 72 | 0.319 | 0.200  | 0.267 | 0.0314 |
| Self-care       | female | 54 | 0.281 | 0.200  | 0.228 | 0.0310 |
|                 | male   | 72 | 0.255 | 0.200  | 0.219 | 0.0258 |
| Getting along   | female | 54 | 0.345 | 0.300  | 0.238 | 0.0324 |
|                 | male   | 72 | 0.342 | 0.200  | 0.253 | 0.0298 |
| Life activities | female | 54 | 0.444 | 0.400  | 0.282 | 0.0383 |
|                 | male   | 72 | 0.371 | 0.400  | 0.249 | 0.0294 |
| Participation   | female | 54 | 0.500 | 0.500  | 0.242 | 0.0330 |
|                 | male   | 72 | 0.423 | 0.400  | 0.206 | 0.0243 |

**Table C2.** Group comparison - Age

|                            |                | Statistic | p     | Mean difference | SE difference | Effect Size                          |
|----------------------------|----------------|-----------|-------|-----------------|---------------|--------------------------------------|
| Total Side Effects         | Mann-Whitney U | 1951      | 0.996 | -4.43e-5        |               | Rank biserial correlation<br>7.68e-4 |
| Psychological Side Effects | Mann-Whitney U | 1729      | 0.269 | -1.0000         |               | Rank biserial correlation<br>0.1147  |
| Neurological Side Effects  | Mann-Whitney U | 1673      | 0.156 | -4.23e-5        |               | Rank biserial correlation<br>0.1431  |
| Autonomic Side Effects     | Mann-Whitney U | 1877      | 0.710 | -3.45e-5        |               | Rank biserial correlation<br>0.0387  |
| Other side effects         | Mann-Whitney U | 1501      | 0.025 | 1.0000          |               | Rank biserial correlation<br>0.2315  |
| Sexual Side Effects        | Mann-Whitney U | 1570      | 0.049 | 4.86e-5         |               | Rank biserial correlation<br>0.1962  |
| WHODAS total               | Mann-Whitney U | 1853      | 0.626 | -0.0170         |               | Rank biserial correlation<br>0.0510  |
| Cognition                  | Mann-Whitney U | 1917      | 0.860 | -8.35e-6        |               | Rank biserial correlation<br>0.0184  |
| Mobility                   | Mann-Whitney U | 1875      | 0.702 | -2.17e-5        |               | Rank biserial correlation<br>0.0397  |
| Self-care                  | Mann-Whitney U | 1714      | 0.223 | -3.34e-5        |               | Rank biserial correlation<br>0.1224  |
| Getting along              | Mann-Whitney U | 1765      | 0.349 | 7.15e-5         |               | Rank biserial correlation<br>0.0960  |
| Life activities            | Mann-Whitney U | 1814      | 0.492 | -3.13e-5        |               | Rank biserial correlation<br>0.0712  |
| Participation              | Mann-Whitney U | 1909      | 0.830 | 5.99e-5         |               | Rank biserial correlation<br>0.0225  |

Note.  $H_a \mu_{18-49 \text{ yo}} \neq \mu_{>50 \text{ yo}}$

Group Descriptives

|                            | <b>Group</b> | <b>N</b> | <b>Mean</b> | <b>Median</b> | <b>SD</b> | <b>SE</b> |
|----------------------------|--------------|----------|-------------|---------------|-----------|-----------|
| Total Side Effects         | 18-49 yo     | 71       | 14.704      | 13.000        | 9.268     | 1.0999    |
|                            | >50 yo       | 55       | 14.545      | 14.000        | 8.593     | 1.1587    |
| Psychological Side Effects | 18-49 yo     | 71       | 4.648       | 4.000         | 4.141     | 0.4914    |
|                            | >50 yo       | 55       | 5.509       | 5.000         | 4.788     | 0.6456    |
| Neurological Side Effects  | 18-49 yo     | 71       | 1.465       | 1.000         | 1.755     | 0.2083    |
|                            | >50 yo       | 55       | 1.800       | 1.000         | 1.682     | 0.2268    |
| Autonomic Side Effects     | 18-49 yo     | 71       | 3.845       | 4.000         | 3.161     | 0.3751    |
|                            | >50 yo       | 55       | 3.891       | 4.000         | 2.629     | 0.3545    |
| Other side effects         | 18-49 yo     | 71       | 4.366       | 4.000         | 3.181     | 0.3776    |
|                            | >50 yo       | 55       | 3.200       | 3.000         | 2.778     | 0.3746    |
| Sexual Side Effects        | 18-49 yo     | 71       | 2.549       | 1.000         | 3.215     | 0.3816    |
|                            | >50 yo       | 55       | 1.655       | 0.000         | 2.696     | 0.3635    |
| WHODAS total               | 18-49 yo     | 71       | 0.360       | 0.333         | 0.205     | 0.0243    |
|                            | >50 yo       | 55       | 0.369       | 0.340         | 0.172     | 0.0232    |
| Cognition                  | 18-49 yo     | 71       | 0.359       | 0.300         | 0.245     | 0.0291    |
|                            | >50 yo       | 55       | 0.373       | 0.292         | 0.241     | 0.0326    |
| Mobility                   | 18-49 yo     | 71       | 0.335       | 0.300         | 0.250     | 0.0297    |
|                            | >50 yo       | 55       | 0.368       | 0.300         | 0.279     | 0.0377    |
| Self-care                  | 18-49 yo     | 71       | 0.247       | 0.200         | 0.226     | 0.0269    |
|                            | >50 yo       | 55       | 0.291       | 0.200         | 0.216     | 0.0291    |
| Getting along              | 18-49 yo     | 71       | 0.362       | 0.300         | 0.259     | 0.0307    |
|                            | >50 yo       | 55       | 0.320       | 0.200         | 0.228     | 0.0307    |
| Life activities            | 18-49 yo     | 71       | 0.391       | 0.400         | 0.270     | 0.0321    |
|                            | >50 yo       | 55       | 0.416       | 0.400         | 0.260     | 0.0350    |
| Participation              | 18-49 yo     | 71       | 0.459       | 0.406         | 0.219     | 0.0260    |
|                            | >50 yo       | 55       | 0.452       | 0.438         | 0.234     | 0.0315    |

**Table C3.** Group comparison – Educational status

|                            |                | <b>Statistic</b> | <b>p</b> | <b>Mean difference</b> | <b>SE difference</b> | <b>Effect Size</b>                   |
|----------------------------|----------------|------------------|----------|------------------------|----------------------|--------------------------------------|
| Total Side Effects         | Mann-Whitney U | 1654             | 0.141    | 2.0000                 |                      | Rank biserial correlation<br>0.15314 |
| Psychological Side Effects | Mann-Whitney U | 1742             | 0.299    | 1.0000                 |                      | Rank biserial correlation<br>0.10781 |
| Neurological Side Effects  | Mann-Whitney U | 1389             | 0.004    | 0.9999                 |                      | Rank biserial correlation<br>0.28860 |
| Autonomic Side Effects     | Mann-Whitney U | 1766             | 0.355    | 5.87e-6                |                      | Rank biserial correlation<br>0.09577 |

|                     |                | <b>Statistic</b> | <b>p</b> | <b>Mean difference</b> | <b>SE difference</b> | <b>Effect Size</b>                   |
|---------------------|----------------|------------------|----------|------------------------|----------------------|--------------------------------------|
| Other side effects  | Mann-Whitney U | 1756             | 0.330    | 5.76e-5                |                      | Rank biserial correlation<br>0.10090 |
| Sexual Side Effects | Mann-Whitney U | 1940             | 0.949    | 1.31e-5                |                      | Rank biserial correlation<br>0.00666 |
| WHODAS total        | Mann-Whitney U | 1823             | 0.526    | 0.0171                 |                      | Rank biserial correlation<br>0.06633 |
| Cognition           | Mann-Whitney U | 1888             | 0.751    | 3.28e-5                |                      | Rank biserial correlation<br>0.03303 |
| Mobility            | Mann-Whitney U | 1738             | 0.288    | 0.0499                 |                      | Rank biserial correlation<br>0.10986 |
| Self-care           | Mann-Whitney U | 1578             | 0.056    | 0.0125                 |                      | Rank biserial correlation<br>0.19181 |
| Getting along       | Mann-Whitney U | 1866             | 0.667    | -1.66e-6               |                      | Rank biserial correlation<br>0.04430 |
| Life activities     | Mann-Whitney U | 1804             | 0.463    | 1.94e-5                |                      | Rank biserial correlation<br>0.07606 |
| Participation       | Mann-Whitney U | 1881             | 0.724    | 5.35e-5                |                      | Rank biserial correlation<br>0.03688 |

Note.  $H_a \mu_{\text{no education}} \neq \mu_{\text{education} > 8 \text{ y}}$

#### Group Descriptives

|                            | <b>Group</b>    | <b>N</b> | <b>Mean</b> | <b>Median</b> | <b>SD</b> | <b>SE</b> |
|----------------------------|-----------------|----------|-------------|---------------|-----------|-----------|
| Total Side Effects         | no education    | 55       | 16.382      | 14.000        | 10.253    | 1.3825    |
|                            | education > 8 y | 71       | 13.282      | 12.000        | 7.584     | 0.9001    |
| Psychological Side Effects | no education    | 55       | 5.600       | 4.000         | 4.852     | 0.6542    |
|                            | education > 8 y | 71       | 4.577       | 4.000         | 4.066     | 0.4826    |
| Neurological Side Effects  | no education    | 55       | 2.109       | 2.000         | 1.863     | 0.2512    |
|                            | education > 8 y | 71       | 1.225       | 1.000         | 1.514     | 0.1796    |
| Autonomic Side Effects     | no education    | 55       | 4.309       | 4.000         | 3.431     | 0.4627    |
|                            | education > 8 y | 71       | 3.521       | 3.000         | 2.443     | 0.2899    |
| Other side effects         | no education    | 55       | 4.091       | 4.000         | 3.026     | 0.4081    |
|                            | education > 8 y | 71       | 3.676       | 3.000         | 3.088     | 0.3665    |
| Sexual Side Effects        | no education    | 55       | 2.236       | 1.000         | 2.994     | 0.4037    |
|                            | education > 8 y | 71       | 2.099       | 1.000         | 3.062     | 0.3634    |
| WHODAS total               | no education    | 55       | 0.378       | 0.320         | 0.185     | 0.0250    |
|                            | education > 8 y | 71       | 0.353       | 0.333         | 0.196     | 0.0232    |
| Cognition                  | no education    | 55       | 0.376       | 0.250         | 0.240     | 0.0324    |
|                            | education > 8 y | 71       | 0.356       | 0.300         | 0.246     | 0.0292    |
| Mobility                   | no education    | 55       | 0.372       | 0.300         | 0.257     | 0.0347    |
|                            | education > 8 y | 71       | 0.332       | 0.300         | 0.268     | 0.0318    |
| Self-care                  | no education    | 55       | 0.303       | 0.200         | 0.234     | 0.0316    |
|                            | education > 8 y | 71       | 0.237       | 0.200         | 0.210     | 0.0249    |
| Getting along              | no education    | 55       | 0.336       | 0.200         | 0.244     | 0.0329    |
|                            | education > 8 y | 71       | 0.350       | 0.300         | 0.249     | 0.0295    |

Group Descriptives

|                 | Group           | N  | Mean  | Median | SD    | SE     |
|-----------------|-----------------|----|-------|--------|-------|--------|
| Life activities | no education    | 55 | 0.415 | 0.400  | 0.257 | 0.0346 |
|                 | education > 8 y | 71 | 0.392 | 0.400  | 0.273 | 0.0323 |
| Participation   | no education    | 55 | 0.464 | 0.438  | 0.234 | 0.0316 |
|                 | education > 8 y | 71 | 0.450 | 0.406  | 0.218 | 0.0259 |

**Table C4.** Group comparison – Marital status

|                            |                | Statistic | p     | Mean difference | SE difference | Effect Size                         |
|----------------------------|----------------|-----------|-------|-----------------|---------------|-------------------------------------|
| Total Side Effects         | Mann-Whitney U | 1214      | 0.039 | -3.00004        |               | Rank biserial correlation<br>0.2377 |
| Psychological Side Effects | Mann-Whitney U | 1308      | 0.119 | -1.00003        |               | Rank biserial correlation<br>0.1790 |
| Neurological Side Effects  | Mann-Whitney U | 1383      | 0.239 | -1.87e-5        |               | Rank biserial correlation<br>0.1316 |
| Autonomic Side Effects     | Mann-Whitney U | 1373      | 0.229 | -0.99997        |               | Rank biserial correlation<br>0.1378 |
| Other side effects         | Mann-Whitney U | 1160      | 0.018 | -1.00006        |               | Rank biserial correlation<br>0.2719 |
| Sexual Side Effects        | Mann-Whitney U | 1210      | 0.029 | -0.99995        |               | Rank biserial correlation<br>0.2405 |
| WHODAS total               | Mann-Whitney U | 1445      | 0.423 | -0.03295        |               | Rank biserial correlation<br>0.0926 |
| Cognition                  | Mann-Whitney U | 1437      | 0.393 | -0.00826        |               | Rank biserial correlation<br>0.0980 |
| Mobility                   | Mann-Whitney U | 1519      | 0.686 | -3.75e-5        |               | Rank biserial correlation<br>0.0465 |
| Self-care                  | Mann-Whitney U | 1146      | 0.012 | -0.09994        |               | Rank biserial correlation<br>0.2807 |
| Getting along              | Mann-Whitney U | 1548      | 0.805 | 4.32e-5         |               | Rank biserial correlation<br>0.0283 |
| Life activities            | Mann-Whitney U | 1506      | 0.637 | -8.03e-6        |               | Rank biserial correlation<br>0.0543 |
| Participation              | Mann-Whitney U | 1507      | 0.642 | -7.68e-5        |               | Rank biserial correlation<br>0.0537 |

Note.  $H_a \mu_{\text{maiden/divorced/widowed}} \neq \mu_{\text{married}}$

Group Descriptives

|                            | Group                   | N  | Mean   | Median | SD    | SE     |
|----------------------------|-------------------------|----|--------|--------|-------|--------|
| Total Side Effects         | maiden/divorced/widowed | 91 | 13.549 | 12.000 | 8.391 | 0.8796 |
|                            | married                 | 35 | 17.457 | 15.000 | 9.820 | 1.6599 |
| Psychological Side Effects | maiden/divorced/widowed | 91 | 4.714  | 4.000  | 4.448 | 0.4663 |

Group Descriptives

|                           | <b>Group</b>            | <b>N</b> | <b>Mean</b> | <b>Median</b> | <b>SD</b> | <b>SE</b> |
|---------------------------|-------------------------|----------|-------------|---------------|-----------|-----------|
|                           | married                 | 35       | 5.829       | 5.000         | 4.369     | 0.7385    |
| Neurological Side Effects | maiden/divorced/widowed | 91       | 1.473       | 1.000         | 1.615     | 0.1693    |
|                           | married                 | 35       | 1.971       | 2.000         | 1.963     | 0.3318    |
| Autonomic Side Effects    | maiden/divorced/widowed | 91       | 3.615       | 3.000         | 2.632     | 0.2759    |
|                           | married                 | 35       | 4.514       | 4.000         | 3.551     | 0.6002    |
| Other side effects        | maiden/divorced/widowed | 91       | 3.462       | 3.000         | 2.899     | 0.3039    |
|                           | married                 | 35       | 4.886       | 4.000         | 3.252     | 0.5497    |
| Sexual Side Effects       | maiden/divorced/widowed | 91       | 1.890       | 1.000         | 2.964     | 0.3108    |
|                           | married                 | 35       | 2.857       | 2.000         | 3.098     | 0.5236    |
| WHODAS total              | maiden/divorced/widowed | 91       | 0.354       | 0.317         | 0.183     | 0.0192    |
|                           | married                 | 35       | 0.391       | 0.359         | 0.209     | 0.0354    |
| Cognition                 | maiden/divorced/widowed | 91       | 0.354       | 0.300         | 0.243     | 0.0255    |
|                           | married                 | 35       | 0.392       | 0.300         | 0.243     | 0.0411    |
| Mobility                  | maiden/divorced/widowed | 91       | 0.345       | 0.250         | 0.264     | 0.0276    |
|                           | married                 | 35       | 0.361       | 0.300         | 0.264     | 0.0446    |
| Self-care                 | maiden/divorced/widowed | 91       | 0.233       | 0.200         | 0.205     | 0.0215    |
|                           | married                 | 35       | 0.350       | 0.250         | 0.245     | 0.0414    |
| Getting along             | maiden/divorced/widowed | 91       | 0.348       | 0.300         | 0.246     | 0.0258    |
|                           | married                 | 35       | 0.331       | 0.300         | 0.247     | 0.0418    |
| Life activities           | maiden/divorced/widowed | 91       | 0.393       | 0.400         | 0.256     | 0.0268    |
|                           | married                 | 35       | 0.427       | 0.400         | 0.291     | 0.0491    |
| Participation             | maiden/divorced/widowed | 91       | 0.447       | 0.406         | 0.210     | 0.0220    |
|                           | married                 | 35       | 0.478       | 0.500         | 0.261     | 0.0441    |

**Table C5.** Group comparison – Parental status

|                            |                | <b>Statistic</b> | <b>p</b> | <b>Mean difference</b> | <b>SE difference</b> | <b>Effect Size</b>                  |
|----------------------------|----------------|------------------|----------|------------------------|----------------------|-------------------------------------|
| Total Side Effects         | Mann-Whitney U | 1674             | 0.235    | -2.0000                |                      | Rank biserial correlation<br>0.1250 |
| Psychological Side Effects | Mann-Whitney U | 1757             | 0.437    | -1.90e-5               |                      | Rank biserial correlation<br>0.0816 |
| Neurological Side Effects  | Mann-Whitney U | 1528             | 0.048    | -2.62e-5               |                      | Rank biserial correlation<br>0.2013 |
| Autonomic Side Effects     | Mann-Whitney U | 1805             | 0.590    | -2.34e-5               |                      | Rank biserial correlation<br>0.0565 |
| Other side effects         | Mann-Whitney U | 1884             | 0.889    | 0.0000                 |                      | Rank biserial correlation<br>0.0149 |
| Sexual Side Effects        | Mann-Whitney U | 1890             | 0.907    | 7.09e-5                |                      | Rank biserial correlation<br>0.0120 |
| WHODAS total               | Mann-Whitney U | 1603             | 0.124    | -0.0500                |                      | Rank biserial correlation<br>0.1621 |

|                 |                | <b>Statistic</b> | <b>p</b> | <b>Mean difference</b> | <b>SE difference</b> |                           | <b>Effect Size</b> |
|-----------------|----------------|------------------|----------|------------------------|----------------------|---------------------------|--------------------|
| Cognition       | Mann-Whitney U | 1730             | 0.362    | -0.0249                |                      | Rank biserial correlation | 0.0954             |
| Mobility        | Mann-Whitney U | 1655             | 0.198    | -0.0500                |                      | Rank biserial correlation | 0.1346             |
| Self-care       | Mann-Whitney U | 1538             | 0.054    | -0.0125                |                      | Rank biserial correlation | 0.1958             |
| Getting along   | Mann-Whitney U | 1874             | 0.848    | -5.15e-5               |                      | Rank biserial correlation | 0.0201             |
| Life activities | Mann-Whitney U | 1520             | 0.050    | -0.1000                |                      | Rank biserial correlation | 0.2052             |
| Participation   | Mann-Whitney U | 1708             | 0.309    | -0.0375                |                      | Rank biserial correlation | 0.1069             |

Note.  $H_a \mu_{\text{without children}} \neq \mu_{\text{with children}}$

#### Group Descriptives

|                            | <b>Group</b>     | <b>N</b> | <b>Mean</b> | <b>Median</b> | <b>SD</b> | <b>SE</b> |
|----------------------------|------------------|----------|-------------|---------------|-----------|-----------|
| Total Side Effects         | without children | 75       | 13.827      | 12.000        | 8.319     | 0.9606    |
|                            | with children    | 51       | 15.824      | 14.000        | 9.756     | 1.3662    |
| Psychological Side Effects | without children | 75       | 4.613       | 4.000         | 4.040     | 0.4665    |
|                            | with children    | 51       | 5.627       | 5.000         | 4.944     | 0.6922    |
| Neurological Side Effects  | without children | 75       | 1.293       | 1.000         | 1.422     | 0.1642    |
|                            | with children    | 51       | 2.078       | 2.000         | 2.018     | 0.2826    |
| Autonomic Side Effects     | without children | 75       | 3.707       | 3.000         | 2.690     | 0.3106    |
|                            | with children    | 51       | 4.098       | 4.000         | 3.263     | 0.4570    |
| Other side effects         | without children | 75       | 3.853       | 3.000         | 2.949     | 0.3405    |
|                            | with children    | 51       | 3.863       | 3.000         | 3.237     | 0.4533    |
| Sexual Side Effects        | without children | 75       | 2.213       | 1.000         | 3.164     | 0.3653    |
|                            | with children    | 51       | 2.078       | 1.000         | 2.827     | 0.3959    |
| WHODAS total               | without children | 75       | 0.339       | 0.317         | 0.176     | 0.0203    |
|                            | with children    | 51       | 0.401       | 0.367         | 0.207     | 0.0290    |
| Cognition                  | without children | 75       | 0.338       | 0.300         | 0.218     | 0.0252    |
|                            | with children    | 51       | 0.404       | 0.300         | 0.272     | 0.0381    |
| Mobility                   | without children | 75       | 0.324       | 0.250         | 0.261     | 0.0301    |
|                            | with children    | 51       | 0.387       | 0.300         | 0.264     | 0.0370    |
| Self-care                  | without children | 75       | 0.231       | 0.200         | 0.202     | 0.0233    |
|                            | with children    | 51       | 0.317       | 0.200         | 0.242     | 0.0339    |
| Getting along              | without children | 75       | 0.333       | 0.300         | 0.225     | 0.0260    |
|                            | with children    | 51       | 0.360       | 0.300         | 0.275     | 0.0385    |
| Life activities            | without children | 75       | 0.364       | 0.344         | 0.252     | 0.0291    |
|                            | with children    | 51       | 0.458       | 0.500         | 0.275     | 0.0386    |
| Participation              | without children | 75       | 0.437       | 0.400         | 0.207     | 0.0239    |
|                            | with children    | 51       | 0.484       | 0.500         | 0.248     | 0.0347    |



## Group Descriptives

|  | Group | N | Mean | Median | SD | SE |
|--|-------|---|------|--------|----|----|
|--|-------|---|------|--------|----|----|

**Table C6.** Group comparison – Occupational status

|                            |                | Statistic | p     | Mean difference | SE difference | Effect Size                         |
|----------------------------|----------------|-----------|-------|-----------------|---------------|-------------------------------------|
| Total Side Effects         | Mann-Whitney U | 1465      | 0.586 | 0.9999          |               | Rank biserial correlation<br>0.0636 |
| Psychological Side Effects | Mann-Whitney U | 1462      | 0.575 | 5.49e-5         |               | Rank biserial correlation<br>0.0652 |
| Neurological Side Effects  | Mann-Whitney U | 1202      | 0.040 | 8.35e-5         |               | Rank biserial correlation<br>0.2315 |
| Autonomic Side Effects     | Mann-Whitney U | 1460      | 0.566 | 1.39e-5         |               | Rank biserial correlation<br>0.0665 |
| Other side effects         | Mann-Whitney U | 1387      | 0.329 | -0.9999         |               | Rank biserial correlation<br>0.1132 |
| Sexual Side Effects        | Mann-Whitney U | 1456      | 0.537 | 3.76e-5         |               | Rank biserial correlation<br>0.0691 |
| WHODAS total               | Mann-Whitney U | 1196      | 0.043 | 0.0670          |               | Rank biserial correlation<br>0.2356 |
| Cognition                  | Mann-Whitney U | 1540      | 0.896 | 4.22e-5         |               | Rank biserial correlation<br>0.0153 |
| Mobility                   | Mann-Whitney U | 1146      | 0.021 | 0.1000          |               | Rank biserial correlation<br>0.2673 |
| Self-care                  | Mann-Whitney U | 1456      | 0.538 | 4.76e-5         |               | Rank biserial correlation<br>0.0694 |
| Getting along              | Mann-Whitney U | 1250      | 0.079 | 0.0999          |               | Rank biserial correlation<br>0.2011 |
| Life activities            | Mann-Whitney U | 1312      | 0.164 | 0.0625          |               | Rank biserial correlation<br>0.1611 |
| Participation              | Mann-Whitney U | 1387      | 0.330 | 0.0313          |               | Rank biserial correlation<br>0.1132 |

Note.  $H_a \mu_{unemployed} \neq \mu_{employed}$

## Group Descriptives

|                            | Group      | N  | Mean   | Median | SD    | SE     |
|----------------------------|------------|----|--------|--------|-------|--------|
| Total Side Effects         | unemployed | 92 | 15.130 | 14.000 | 9.662 | 1.0073 |
|                            | employed   | 34 | 13.294 | 12.500 | 6.567 | 1.1262 |
| Psychological Side Effects | unemployed | 92 | 5.163  | 4.000  | 4.478 | 0.4668 |
|                            | employed   | 34 | 4.647  | 4.000  | 4.368 | 0.7492 |
| Neurological Side Effects  | unemployed | 92 | 1.815  | 1.000  | 1.821 | 0.1899 |
|                            | employed   | 34 | 1.059  | 1.000  | 1.301 | 0.2232 |
| Autonomic Side Effects     | unemployed | 92 | 4.011  | 4.000  | 3.115 | 0.3248 |
|                            | employed   | 34 | 3.471  | 4.000  | 2.351 | 0.4033 |

Group Descriptives

|                     | <b>Group</b> | <b>N</b> | <b>Mean</b> | <b>Median</b> | <b>SD</b> | <b>SE</b> |
|---------------------|--------------|----------|-------------|---------------|-----------|-----------|
| Other side effects  | unemployed   | 92       | 3.837       | 3.000         | 3.332     | 0.3474    |
|                     | employed     | 34       | 3.912       | 4.000         | 2.179     | 0.3738    |
| Sexual Side Effects | unemployed   | 92       | 2.337       | 1.000         | 3.198     | 0.3334    |
|                     | employed     | 34       | 1.676       | 1.000         | 2.458     | 0.4216    |
| WHODAS total        | unemployed   | 92       | 0.382       | 0.365         | 0.187     | 0.0195    |
|                     | employed     | 34       | 0.316       | 0.277         | 0.195     | 0.0334    |
| Cognition           | unemployed   | 92       | 0.366       | 0.300         | 0.234     | 0.0244    |
|                     | employed     | 34       | 0.362       | 0.300         | 0.268     | 0.0460    |
| Mobility            | unemployed   | 92       | 0.386       | 0.300         | 0.278     | 0.0290    |
|                     | employed     | 34       | 0.251       | 0.200         | 0.187     | 0.0321    |
| Self-care           | unemployed   | 92       | 0.269       | 0.200         | 0.214     | 0.0223    |
|                     | employed     | 34       | 0.258       | 0.200         | 0.245     | 0.0421    |
| Getting along       | unemployed   | 92       | 0.369       | 0.300         | 0.247     | 0.0258    |
|                     | employed     | 34       | 0.276       | 0.200         | 0.232     | 0.0398    |
| Life activities     | unemployed   | 92       | 0.423       | 0.400         | 0.274     | 0.0286    |
|                     | employed     | 34       | 0.347       | 0.356         | 0.232     | 0.0399    |
| Participation       | unemployed   | 92       | 0.467       | 0.469         | 0.228     | 0.0238    |
|                     | employed     | 34       | 0.426       | 0.400         | 0.214     | 0.0367    |

**Table C7.** Group comparison – Diagnosis

|                            |                | <b>Statistic</b> | <b>P</b> | <b>Mean difference</b> | <b>SE difference</b> | <b>Effect Size</b>                  |
|----------------------------|----------------|------------------|----------|------------------------|----------------------|-------------------------------------|
| Total Side Effects         | Mann-Whitney U | 1523             | 0.213    | -2.0000                |                      | Rank biserial correlation<br>0.1366 |
| Psychological Side Effects | Mann-Whitney U | 1481             | 0.141    | -1.0000                |                      | Rank biserial correlation<br>0.1607 |
| Neurological Side Effects  | Mann-Whitney U | 1529             | 0.210    | -4.69e-5               |                      | Rank biserial correlation<br>0.1332 |
| Autonomic Side Effects     | Mann-Whitney U | 1557             | 0.281    | -1.0000                |                      | Rank biserial correlation<br>0.1173 |
| Other side effects         | Mann-Whitney U | 1709             | 0.776    | -1.86e-6               |                      | Rank biserial correlation<br>0.0312 |
| Sexual Side Effects        | Mann-Whitney U | 1638             | 0.497    | -2.88e-5               |                      | Rank biserial correlation<br>0.0714 |
| WHODAS total               | Mann-Whitney U | 1214             | 0.004    | -0.1000                |                      | Rank biserial correlation<br>0.3121 |
| Cognition                  | Mann-Whitney U | 1477             | 0.135    | -0.0583                |                      | Rank biserial correlation<br>0.1627 |
| Mobility                   | Mann-Whitney U | 1308             | 0.017    | -0.1000                |                      | Rank biserial correlation<br>0.2588 |
| Self-care                  | Mann-Whitney U | 1506             | 0.167    | -1.09e-5               |                      | Rank biserial correlation<br>0.1463 |

|                 |                | <b>Statistic</b> | <b>p</b> | <b>Mean difference</b> | <b>SE difference</b> | <b>Effect Size</b>                  |
|-----------------|----------------|------------------|----------|------------------------|----------------------|-------------------------------------|
| Getting along   | Mann-Whitney U | 1565             | 0.295    | -8.33e-5               |                      | Rank biserial correlation<br>0.1131 |
| Life activities | Mann-Whitney U | 1261             | 0.009    | -0.1626                |                      | Rank biserial correlation<br>0.2854 |
| Participation   | Mann-Whitney U | 1251             | 0.008    | -0.1000                |                      | Rank biserial correlation<br>0.2911 |

Note.  $H_a \mu$  schizophrenia spectrum disorder  $\neq \mu$  bipolar disorder

#### Group Descriptives

|                            | <b>Group</b>                    | <b>N</b> | <b>Mean</b> | <b>Median</b> | <b>SD</b> | <b>SE</b> |
|----------------------------|---------------------------------|----------|-------------|---------------|-----------|-----------|
| Total Side Effects         | schizophrenia spectrum disorder | 84       | 13.774      | 12.000        | 8.197     | 0.8944    |
|                            | bipolar disorder                | 42       | 16.357      | 14.000        | 10.166    | 1.5687    |
| Psychological Side Effects | schizophrenia spectrum disorder | 84       | 4.619       | 4.000         | 4.222     | 0.4607    |
|                            | bipolar disorder                | 42       | 5.833       | 5.000         | 4.788     | 0.7388    |
| Neurological Side Effects  | schizophrenia spectrum disorder | 84       | 1.500       | 1.000         | 1.739     | 0.1897    |
|                            | bipolar disorder                | 42       | 1.833       | 2.000         | 1.695     | 0.2616    |
| Autonomic Side Effects     | schizophrenia spectrum disorder | 84       | 3.690       | 3.000         | 2.945     | 0.3213    |
|                            | bipolar disorder                | 42       | 4.214       | 4.000         | 2.901     | 0.4476    |
| Other side effects         | schizophrenia spectrum disorder | 84       | 3.667       | 3.000         | 2.743     | 0.2993    |
|                            | bipolar disorder                | 42       | 4.238       | 3.000         | 3.608     | 0.5567    |
| Sexual Side Effects        | schizophrenia spectrum disorder | 84       | 1.976       | 1.000         | 2.755     | 0.3006    |
|                            | bipolar disorder                | 42       | 2.524       | 1.000         | 3.501     | 0.5402    |
| WHODAS total               | schizophrenia spectrum disorder | 84       | 0.330       | 0.283         | 0.177     | 0.0193    |
|                            | bipolar disorder                | 42       | 0.431       | 0.419         | 0.201     | 0.0311    |
| Cognition                  | schizophrenia spectrum disorder | 84       | 0.345       | 0.250         | 0.246     | 0.0269    |
|                            | bipolar disorder                | 42       | 0.404       | 0.354         | 0.233     | 0.0360    |
| Mobility                   | schizophrenia spectrum disorder | 84       | 0.312       | 0.200         | 0.261     | 0.0285    |
|                            | bipolar disorder                | 42       | 0.425       | 0.425         | 0.252     | 0.0389    |
| Self-care                  | schizophrenia spectrum disorder | 84       | 0.238       | 0.200         | 0.197     | 0.0215    |
|                            | bipolar disorder                | 42       | 0.322       | 0.200         | 0.258     | 0.0399    |
| Getting along              | schizophrenia spectrum disorder | 84       | 0.322       | 0.300         | 0.232     | 0.0253    |
|                            | bipolar disorder                | 42       | 0.388       | 0.350         | 0.269     | 0.0415    |
| Life activities            | schizophrenia spectrum disorder | 84       | 0.354       | 0.306         | 0.241     | 0.0263    |
|                            | bipolar disorder                | 42       | 0.498       | 0.500         | 0.288     | 0.0444    |
| Participation              | schizophrenia spectrum disorder | 84       | 0.419       | 0.400         | 0.215     | 0.0235    |
|                            | bipolar disorder                | 42       | 0.531       | 0.500         | 0.227     | 0.0350    |

**Table C8.** Group comparison – antipsychotic administration

|                            |                | <b>Statistic</b> | <b>p</b> | <b>Mean difference</b> | <b>SE difference</b> | <b>Effect Size</b>                  |
|----------------------------|----------------|------------------|----------|------------------------|----------------------|-------------------------------------|
| Total Side Effects         | Mann-Whitney U | 1252             | 0.002    | 4.0000                 |                      | Rank biserial correlation<br>0.3315 |
| Psychological Side Effects | Mann-Whitney U | 1387             | 0.014    | 1.0000                 |                      | Rank biserial correlation<br>0.2591 |
| Neurological Side Effects  | Mann-Whitney U | 1599             | 0.157    | 8.66e-6                |                      | Rank biserial correlation<br>0.1458 |
| Autonomic Side Effects     | Mann-Whitney U | 1349             | 0.008    | 1.0001                 |                      | Rank biserial correlation<br>0.2794 |
| Other side effects         | Mann-Whitney U | 1303             | 0.004    | 1.0000                 |                      | Rank biserial correlation<br>0.3040 |
| Sexual Side Effects        | Mann-Whitney U | 1363             | 0.008    | 0.9999                 |                      | Rank biserial correlation<br>0.2719 |
| WHODAS total               | Mann-Whitney U | 1664             | 0.296    | 0.0390                 |                      | Rank biserial correlation<br>0.1114 |
| Cognition                  | Mann-Whitney U | 1719             | 0.438    | 9.58e-6                |                      | Rank biserial correlation<br>0.0820 |
| Mobility                   | Mann-Whitney U | 1754             | 0.550    | 1.07e-6                |                      | Rank biserial correlation<br>0.0633 |
| Self-care                  | Mann-Whitney U | 1736             | 0.480    | 3.61e-5                |                      | Rank biserial correlation<br>0.0726 |
| Getting along              | Mann-Whitney U | 1793             | 0.686    | 5.17e-5                |                      | Rank biserial correlation<br>0.0425 |
| Life activities            | Mann-Whitney U | 1530             | 0.083    | 0.1000                 |                      | Rank biserial correlation<br>0.1830 |
| Participation              | Mann-Whitney U | 1567             | 0.125    | 0.0750                 |                      | Rank biserial correlation<br>0.1629 |

Note.  $H_a \mu_{oral} \neq \mu_{LAI}$

#### Group Descriptives

|                            | <b>Group</b> | <b>N</b> | <b>Mean</b> | <b>Median</b> | <b>SD</b> | <b>SE</b> |
|----------------------------|--------------|----------|-------------|---------------|-----------|-----------|
| Total Side Effects         | oral         | 78       | 16.436      | 14.500        | 9.176     | 1.0390    |
|                            | LAI          | 48       | 11.708      | 10.000        | 7.792     | 1.1247    |
| Psychological Side Effects | oral         | 78       | 5.564       | 5.000         | 4.335     | 0.4909    |
|                            | LAI          | 48       | 4.146       | 3.000         | 4.505     | 0.6503    |
| Neurological Side Effects  | oral         | 78       | 1.782       | 1.000         | 1.799     | 0.2037    |
|                            | LAI          | 48       | 1.333       | 1.000         | 1.576     | 0.2274    |
| Autonomic Side Effects     | oral         | 78       | 4.397       | 4.000         | 3.042     | 0.3445    |
|                            | LAI          | 48       | 3.000       | 2.000         | 2.535     | 0.3659    |
| Other side effects         | oral         | 78       | 4.410       | 4.000         | 3.085     | 0.3493    |
|                            | LAI          | 48       | 2.958       | 2.500         | 2.813     | 0.4060    |
| Sexual Side Effects        | oral         | 78       | 2.487       | 1.000         | 3.145     | 0.3561    |
|                            | LAI          | 48       | 1.625       | 0.000         | 2.757     | 0.3979    |
| WHODAS total               | oral         | 78       | 0.378       | 0.333         | 0.179     | 0.0203    |
|                            | LAI          | 48       | 0.342       | 0.308         | 0.208     | 0.0300    |
| Cognition                  | oral         | 78       | 0.379       | 0.300         | 0.237     | 0.0269    |

Group Descriptives

|                 | Group | N  | Mean  | Median | SD    | SE     |
|-----------------|-------|----|-------|--------|-------|--------|
| Mobility        | LAI   | 48 | 0.342 | 0.300  | 0.252 | 0.0364 |
|                 | oral  | 78 | 0.355 | 0.300  | 0.247 | 0.0280 |
| Self-care       | LAI   | 48 | 0.342 | 0.250  | 0.289 | 0.0417 |
|                 | oral  | 78 | 0.278 | 0.200  | 0.219 | 0.0248 |
| Getting along   | LAI   | 48 | 0.247 | 0.200  | 0.228 | 0.0329 |
|                 | oral  | 78 | 0.346 | 0.300  | 0.228 | 0.0259 |
| Life activities | LAI   | 48 | 0.340 | 0.300  | 0.274 | 0.0396 |
|                 | oral  | 78 | 0.433 | 0.400  | 0.246 | 0.0279 |
| Participation   | LAI   | 48 | 0.352 | 0.300  | 0.289 | 0.0417 |
|                 | oral  | 78 | 0.478 | 0.453  | 0.213 | 0.0242 |
|                 | LAI   | 48 | 0.420 | 0.400  | 0.240 | 0.0346 |

**Table D.** Orals vs LAIs comparison in specific side effects

Independent Samples T-Test

|          |                | Statistic | p     | Mean difference | SE difference | Effect Size                          |
|----------|----------------|-----------|-------|-----------------|---------------|--------------------------------------|
| UKU_1.1  | Mann-Whitney U | 1690      | 0.308 | 6.95e-5         |               | Rank biserial correlation<br>0.09749 |
| UKU_1.2  | Mann-Whitney U | 1667      | 0.266 | 7.94e-5         |               | Rank biserial correlation<br>0.10951 |
| UKU_1.3  | Mann-Whitney U | 1764      | 0.495 | 4.28e-5         |               | Rank biserial correlation<br>0.05769 |
| UKU_1.4  | Mann-Whitney U | 1835      | 0.830 | 2.31e-5         |               | Rank biserial correlation<br>0.01976 |
| UKU_1.5  | Mann-Whitney U | 1656      | 0.206 | 8.57e-5         |               | Rank biserial correlation<br>0.11565 |
| UKU_1.6  | Mann-Whitney U | 1408      | 0.012 | 3.34e-5         |               | Rank biserial correlation<br>0.24786 |
| UKU_1.7  | Mann-Whitney U | 1736      | 0.341 | 2.27e-5         |               | Rank biserial correlation<br>0.07292 |
| UKU_1.8  | Mann-Whitney U | 1565      | 0.029 | 5.08e-5         |               | Rank biserial correlation<br>0.16400 |
| UKU_1.9  | Mann-Whitney U | 1869      | 0.982 | -8.83e-6        |               | Rank biserial correlation<br>0.00187 |
| UKU_1.10 | Mann-Whitney U | 1813      | 0.697 | -2.82e-5        |               | Rank biserial correlation<br>0.03178 |
| UKU_2.1  | Mann-Whitney U | 1836      | 0.743 | -6.38e-5        |               | Rank biserial correlation<br>0.01923 |
| UKU_2.2  | Mann-Whitney U | 1826      | 0.738 | -5.40e-5        |               | Rank biserial correlation<br>0.02457 |
| UKU_2.3  | Mann-Whitney U | 1775      | 0.536 | 4.37e-5         |               | Rank biserial correlation<br>0.05182 |

## Independent Samples T-Test

|            |                | <b>Statistic</b> | <b>p</b> | <b>Mean difference</b> | <b>SE difference</b> |                           | <b>Effect Size</b> |
|------------|----------------|------------------|----------|------------------------|----------------------|---------------------------|--------------------|
| UKU_2.4    | Mann-Whitney U | 1868             | 0.962    | 2.04e-5                |                      | Rank biserial correlation | 0.00240            |
| UKU_2.5    | Mann-Whitney U | 1785             | 0.579    | 7.99e-6                |                      | Rank biserial correlation | 0.04647            |
| UKU_2.6    | Mann-Whitney U | 1820             | 0.670    | 4.06e-5                |                      | Rank biserial correlation | 0.02778            |
| UKU_2.7    | Mann-Whitney U | 1800             | 0.174    | 0.00                   |                      | Rank biserial correlation | 0.03846            |
| UKU_2.8    | Mann-Whitney U | 1590             | 0.055    | 5.87e-5                |                      | Rank biserial correlation | 0.15091            |
| UKU_3.1    | Mann-Whitney U | 1709             | 0.224    | 1.13e-5                |                      | Rank biserial correlation | 0.08707            |
| UKU_3.2    | Mann-Whitney U | 1768             | 0.473    | -1.53e-6               |                      | Rank biserial correlation | 0.05556            |
| UKU_3.3    | Mann-Whitney U | 1546             | 0.054    | 3.98e-5                |                      | Rank biserial correlation | 0.17415            |
| UKU_3.4    | Mann-Whitney U | 1618             | 0.058    | 3.40e-5                |                      | Rank biserial correlation | 0.13595            |
| UKU_3.5    | Mann-Whitney U | 1840             | 0.817    | -3.32e-5               |                      | Rank biserial correlation | 0.01736            |
| UKU_3.6    | Mann-Whitney U | 1493             | 0.014    | 1.12e-5                |                      | Rank biserial correlation | 0.20246            |
| UKU_3.7    | Mann-Whitney U | 1732             | 0.152    | 1.99e-5                |                      | Rank biserial correlation | 0.07479            |
| UKU_3.8.1  | Mann-Whitney U | 1688             | 0.283    | 6.06e-5                |                      | Rank biserial correlation | 0.09856            |
| UKU_3.8.2  | Mann-Whitney U | 1768             | 0.542    | 7.51e-7                |                      | Rank biserial correlation | 0.05582            |
| UKU_3.9    | Mann-Whitney U | 1833             | 0.769    | -9.33e-7               |                      | Rank biserial correlation | 0.02083            |
| UKU_3.10   | Mann-Whitney U | 1839             | 0.831    | -2.96e-5               |                      | Rank biserial correlation | 0.01790            |
| UKU_3.11   | Mann-Whitney U | 1606             | 0.069    | 4.00e-5                |                      | Rank biserial correlation | 0.14209            |
| UKU_4.1    | Mann-Whitney U | 1800             | 0.174    | 0.00                   |                      | Rank biserial correlation | 0.03846            |
| UKU_4.2    | Mann-Whitney U | 1610             | 0.046    | 2.27e-5                |                      | Rank biserial correlation | 0.14022            |
| UKU_4.3    | Mann-Whitney U | 1829             | 0.591    | 2.64e-5                |                      | Rank biserial correlation | 0.02297            |
| UKU_4.4    | Mann-Whitney U | 1824             | 0.270    | 0.00                   |                      | Rank biserial correlation | 0.02564            |
| UKU_4.5    | Mann-Whitney U | 1753             | 0.494    | -8.50e-6               |                      | Rank biserial correlation | 0.06384            |
| UKU_4.6    | Mann-Whitney U | 1584             | 0.069    | 5.17e-5                |                      | Rank biserial correlation | 0.15411            |
| UKU_4.7    | Mann-Whitney U | 1827             | 0.573    | 9.46e-5                |                      | Rank biserial correlation | 0.02404            |
| UKU_4.8    | Mann-Whitney U | 1766             | 0.180    | 3.22e-5                |                      | Rank biserial correlation | 0.05689            |
| UKU_4.9    | Mann-Whitney U | 1824             | 0.270    | 0.00                   |                      | Rank biserial correlation | 0.02564            |
| UKU_4.10.1 | Mann-Whitney U | 1752             | 0.076    | 0.00                   |                      | Rank biserial correlation | 0.06410            |
| UKU_4.10.2 | Mann-Whitney U | 1799             | 0.457    | 2.79e-5                |                      | Rank biserial correlation | 0.03900            |

Independent Samples T-Test

|          |                | <b>Statistic</b> | <b>p</b> | <b>Mean difference</b> | <b>SE difference</b> | <b>Effect Size</b>                   |
|----------|----------------|------------------|----------|------------------------|----------------------|--------------------------------------|
| UKU_4.11 | Mann-Whitney U | 1786             | 0.333    | 1.65e-5                |                      | Rank biserial correlation<br>0.04621 |
| UKU_4.12 | Mann-Whitney U | 1580             | 0.088    | 2.98e-5                |                      | Rank biserial correlation<br>0.15598 |
| UKU_4.13 | Mann-Whitney U | 1861             | 0.927    | 7.23e-5                |                      | Rank biserial correlation<br>0.00588 |
| UKU_4.14 | Mann-Whitney U | 1848             | 0.839    | -4.29e-6               |                      | Rank biserial correlation<br>0.01309 |
| UKU_4.15 | Mann-Whitney U | 1768             | 0.474    | 6.43e-5                |                      | Rank biserial correlation<br>0.05556 |
| UKU_4.16 | Mann-Whitney U | 1864             | 0.887    | 3.44e-5                |                      | Rank biserial correlation<br>0.00427 |
| UKU_4.17 | Mann-Whitney U | 1728             | 0.374    | 1.91e-5                |                      | Rank biserial correlation<br>0.07692 |

Note.  $H_a \mu_{oral} \neq \mu_{LAI}$

Group Descriptives

|          | <b>Group</b> | <b>N</b> | <b>Mean</b> | <b>Median</b> | <b>SD</b> | <b>SE</b> |
|----------|--------------|----------|-------------|---------------|-----------|-----------|
| UKU_1.1  | oral         | 78       | 0.7308      | 0.00          | 0.893     | 0.1011    |
|          | LAI          | 48       | 0.5625      | 0.00          | 0.823     | 0.1187    |
| UKU_1.2  | oral         | 78       | 0.8974      | 1.00          | 1.014     | 0.1148    |
|          | LAI          | 48       | 0.6667      | 0.00          | 0.859     | 0.1240    |
| UKU_1.3  | oral         | 78       | 0.4103      | 0.00          | 0.711     | 0.0804    |
|          | LAI          | 48       | 0.3333      | 0.00          | 0.663     | 0.0957    |
| UKU_1.4  | oral         | 78       | 0.5256      | 0.00          | 0.768     | 0.0870    |
|          | LAI          | 48       | 0.5000      | 0.00          | 0.772     | 0.1114    |
| UKU_1.5  | oral         | 78       | 0.5513      | 0.00          | 0.750     | 0.0849    |
|          | LAI          | 48       | 0.3958      | 0.00          | 0.676     | 0.0976    |
| UKU_1.6  | oral         | 78       | 0.9744      | 1.00          | 0.897     | 0.1016    |
|          | LAI          | 48       | 0.5833      | 0.00          | 0.739     | 0.1067    |
| UKU_1.7  | oral         | 78       | 0.4487      | 0.00          | 0.878     | 0.0994    |
|          | LAI          | 48       | 0.3333      | 0.00          | 0.834     | 0.1203    |
| UKU_1.8  | oral         | 78       | 0.4359      | 0.00          | 0.815     | 0.0923    |
|          | LAI          | 48       | 0.1667      | 0.00          | 0.519     | 0.0749    |
| UKU_1.9  | oral         | 78       | 0.2436      | 0.00          | 0.585     | 0.0663    |
|          | LAI          | 48       | 0.2083      | 0.00          | 0.459     | 0.0663    |
| UKU_1.10 | oral         | 78       | 0.3462      | 0.00          | 0.680     | 0.0770    |
|          | LAI          | 48       | 0.3958      | 0.00          | 0.707     | 0.1020    |
| UKU_2.1  | oral         | 78       | 0.1282      | 0.00          | 0.406     | 0.0460    |
|          | LAI          | 48       | 0.1250      | 0.00          | 0.334     | 0.0482    |
| UKU_2.2  | oral         | 78       | 0.2179      | 0.00          | 0.501     | 0.0567    |
|          | LAI          | 48       | 0.2292      | 0.00          | 0.472     | 0.0682    |

## Group Descriptives

|           | <b>Group</b> | <b>N</b> | <b>Mean</b> | <b>Median</b> | <b>SD</b> | <b>SE</b> |
|-----------|--------------|----------|-------------|---------------|-----------|-----------|
| UKU_2.3   | oral         | 78       | 0.3718      | 0.00          | 0.626     | 0.0709    |
|           | LAI          | 48       | 0.2917      | 0.00          | 0.544     | 0.0785    |
| UKU_2.4   | oral         | 78       | 0.0769      | 0.00          | 0.313     | 0.0354    |
|           | LAI          | 48       | 0.0625      | 0.00          | 0.245     | 0.0353    |
| UKU_2.5   | oral         | 78       | 0.3846      | 0.00          | 0.669     | 0.0757    |
|           | LAI          | 48       | 0.3125      | 0.00          | 0.589     | 0.0850    |
| UKU_2.6   | oral         | 78       | 0.2051      | 0.00          | 0.543     | 0.0615    |
|           | LAI          | 48       | 0.1667      | 0.00          | 0.476     | 0.0688    |
| UKU_2.7   | oral         | 78       | 0.0897      | 0.00          | 0.461     | 0.0522    |
|           | LAI          | 48       | 0.0000      | 0.00          | 0.000     | 0.0000    |
| UKU_2.8   | oral         | 78       | 0.3077      | 0.00          | 0.492     | 0.0557    |
|           | LAI          | 48       | 0.1458      | 0.00          | 0.357     | 0.0515    |
| UKU_3.1   | oral         | 78       | 0.2436      | 0.00          | 0.488     | 0.0553    |
|           | LAI          | 48       | 0.1667      | 0.00          | 0.476     | 0.0688    |
| UKU_3.2   | oral         | 78       | 0.2436      | 0.00          | 0.539     | 0.0610    |
|           | LAI          | 48       | 0.3750      | 0.00          | 0.761     | 0.1099    |
| UKU_3.3   | oral         | 78       | 0.5769      | 0.00          | 0.765     | 0.0866    |
|           | LAI          | 48       | 0.3333      | 0.00          | 0.630     | 0.0910    |
| UKU_3.4   | oral         | 78       | 0.3590      | 0.00          | 0.755     | 0.0855    |
|           | LAI          | 48       | 0.1042      | 0.00          | 0.309     | 0.0446    |
| UKU_3.5   | oral         | 78       | 0.2436      | 0.00          | 0.539     | 0.0610    |
|           | LAI          | 48       | 0.2708      | 0.00          | 0.574     | 0.0828    |
| UKU_3.6   | oral         | 78       | 0.4872      | 0.00          | 0.752     | 0.0851    |
|           | LAI          | 48       | 0.2083      | 0.00          | 0.582     | 0.0840    |
| UKU_3.7   | oral         | 78       | 0.1667      | 0.00          | 0.568     | 0.0643    |
|           | LAI          | 48       | 0.0417      | 0.00          | 0.202     | 0.0291    |
| UKU_3.8.1 | oral         | 78       | 0.6026      | 0.00          | 0.858     | 0.0971    |
|           | LAI          | 48       | 0.4167      | 0.00          | 0.679     | 0.0980    |
| UKU_3.8.2 | oral         | 78       | 0.5769      | 0.00          | 0.876     | 0.0991    |
|           | LAI          | 48       | 0.4167      | 0.00          | 0.613     | 0.0885    |
| UKU_3.9   | oral         | 78       | 0.1667      | 0.00          | 0.375     | 0.0425    |
|           | LAI          | 48       | 0.1875      | 0.00          | 0.394     | 0.0569    |
| UKU_3.10  | oral         | 78       | 0.3462      | 0.00          | 0.661     | 0.0749    |
|           | LAI          | 48       | 0.3125      | 0.00          | 0.512     | 0.0739    |
| UKU_3.11  | oral         | 78       | 0.3846      | 0.00          | 0.707     | 0.0800    |
|           | LAI          | 48       | 0.1667      | 0.00          | 0.429     | 0.0620    |
| UKU_4.1   | oral         | 78       | 0.0641      | 0.00          | 0.336     | 0.0380    |
|           | LAI          | 48       | 0.0000      | 0.00          | 0.000     | 0.0000    |
| UKU_4.2   | oral         | 78       | 0.2692      | 0.00          | 0.527     | 0.0596    |
|           | LAI          | 48       | 0.1458      | 0.00          | 0.545     | 0.0787    |
| UKU_4.3   | oral         | 78       | 0.0769      | 0.00          | 0.313     | 0.0354    |
|           | LAI          | 48       | 0.0417      | 0.00          | 0.202     | 0.0291    |
| UKU_4.4   | oral         | 78       | 0.0256      | 0.00          | 0.159     | 0.0180    |



Group Descriptives

|            | <b>Group</b> | <b>N</b> | <b>Mean</b> | <b>Median</b> | <b>SD</b> | <b>SE</b> |
|------------|--------------|----------|-------------|---------------|-----------|-----------|
|            | LAI          | 48       | 0.0000      | 0.00          | 0.000     | 0.0000    |
| UKU_4.5    | oral         | 78       | 0.7436      | 0.00          | 1.145     | 0.1296    |
|            | LAI          | 48       | 0.7708      | 0.00          | 0.973     | 0.1404    |
| UKU_4.6    | oral         | 78       | 0.5769      | 0.00          | 0.905     | 0.1024    |
|            | LAI          | 48       | 0.3333      | 0.00          | 0.781     | 0.1127    |
| UKU_4.7    | oral         | 78       | 0.1026      | 0.00          | 0.414     | 0.0468    |
|            | LAI          | 48       | 0.0417      | 0.00          | 0.202     | 0.0291    |
| UKU_4.8    | oral         | 78       | 0.1923      | 0.00          | 0.704     | 0.0797    |
|            | LAI          | 48       | 0.0417      | 0.00          | 0.289     | 0.0417    |
| UKU_4.9    | oral         | 78       | 0.0769      | 0.00          | 0.477     | 0.0540    |
|            | LAI          | 48       | 0.0000      | 0.00          | 0.000     | 0.0000    |
| UKU_4.10.1 | oral         | 78       | 0.0641      | 0.00          | 0.247     | 0.0279    |
|            | LAI          | 48       | 0.0000      | 0.00          | 0.000     | 0.0000    |
| UKU_4.10.2 | oral         | 78       | 0.1282      | 0.00          | 0.406     | 0.0460    |
|            | LAI          | 48       | 0.1042      | 0.00          | 0.472     | 0.0682    |
| UKU_4.11   | oral         | 78       | 0.0897      | 0.00          | 0.288     | 0.0326    |
|            | LAI          | 48       | 0.0625      | 0.00          | 0.320     | 0.0462    |
| UKU_4.12   | oral         | 78       | 0.7821      | 0.00          | 1.077     | 0.1219    |
|            | LAI          | 48       | 0.4792      | 0.00          | 0.875     | 0.1263    |
| UKU_4.13   | oral         | 78       | 0.2564      | 0.00          | 0.763     | 0.0864    |
|            | LAI          | 48       | 0.2083      | 0.00          | 0.617     | 0.0891    |
| UKU_4.14   | oral         | 78       | 0.2821      | 0.00          | 0.804     | 0.0911    |
|            | LAI          | 48       | 0.2708      | 0.00          | 0.707     | 0.1020    |
| UKU_4.15   | oral         | 78       | 0.4615      | 0.00          | 0.907     | 0.1027    |
|            | LAI          | 48       | 0.3542      | 0.00          | 0.785     | 0.1133    |
| UKU_4.16   | oral         | 78       | 0.0513      | 0.00          | 0.318     | 0.0360    |
|            | LAI          | 48       | 0.0625      | 0.00          | 0.433     | 0.0625    |
| UKU_4.17   | oral         | 78       | 0.4487      | 0.00          | 0.714     | 0.0809    |
|            | LAI          | 48       | 0.3125      | 0.00          | 0.552     | 0.0797    |

**Table E.** Dwass-Steel-Critchlow-Fligner pairwise comparisons

Pairwise comparisons – UKU Total score

|                           |                                  | <b>W</b> | <b>p</b> |
|---------------------------|----------------------------------|----------|----------|
| muscarinic                | adrenergic                       | -3.797   | 0.102    |
| muscarinic                | serotonergic/dopaminergic        | -1.288   | 0.971    |
| muscarinic                | dopaminergic                     | -2.226   | 0.699    |
| muscarinic                | LAI muscarinic                   | -4.132   | 0.054    |
| muscarinic                | LAI adrenergic                   | -2.919   | 0.375    |
| muscarinic                | LAI<br>serotonergic/dopaminergic | -2.848   | 0.406    |
| adrenergic                | serotonergic/dopaminergic        | 2.092    | 0.758    |
| adrenergic                | dopaminergic                     | -1.520   | 0.936    |
| adrenergic                | LAI muscarinic                   | -1.785   | 0.869    |
| adrenergic                | LAI adrenergic                   | -1.315   | 0.968    |
| adrenergic                | LAI<br>serotonergic/dopaminergic | 0.165    | 1.000    |
| serotonergic/dopaminergic | dopaminergic                     | -1.944   | 0.816    |
| serotonergic/dopaminergic | LAI muscarinic                   | -2.941   | 0.365    |
| serotonergic/dopaminergic | LAI adrenergic                   | -2.288   | 0.671    |
| serotonergic/dopaminergic | LAI<br>serotonergic/dopaminergic | -1.594   | 0.920    |
| dopaminergic              | LAI muscarinic                   | 1.234    | 0.977    |
| dopaminergic              | LAI adrenergic                   | 1.070    | 0.989    |
| dopaminergic              | LAI<br>serotonergic/dopaminergic | 1.798    | 0.865    |
| LAI muscarinic            | LAI adrenergic                   | 0.221    | 1.000    |
| LAI muscarinic            | LAI<br>serotonergic/dopaminergic | 1.507    | 0.938    |
| LAI adrenergic            | LAI<br>serotonergic/dopaminergic | 1.383    | 0.959    |

Pairwise comparisons - Psychological Side Effects

|                           |                                  | <b>W</b> | <b>p</b> |
|---------------------------|----------------------------------|----------|----------|
| muscarinic                | adrenergic                       | -2.298   | 0.666    |
| muscarinic                | serotonergic/dopaminergic        | -1.729   | 0.886    |
| muscarinic                | dopaminergic                     | -2.309   | 0.661    |
| muscarinic                | LAI muscarinic                   | -2.697   | 0.476    |
| muscarinic                | LAI adrenergic                   | -1.668   | 0.902    |
| muscarinic                | LAI<br>serotonergic/dopaminergic | -2.906   | 0.380    |
| adrenergic                | serotonergic/dopaminergic        | 1.044    | 0.990    |
| adrenergic                | dopaminergic                     | -2.280   | 0.675    |
| adrenergic                | LAI muscarinic                   | -0.817   | 0.997    |
| adrenergic                | LAI adrenergic                   | -0.498   | 1.000    |
| adrenergic                | LAI<br>serotonergic/dopaminergic | -0.498   | 1.000    |
| serotonergic/dopaminergic | dopaminergic                     | -2.274   | 0.677    |
| serotonergic/dopaminergic | LAI muscarinic                   | -1.661   | 0.904    |
| serotonergic/dopaminergic | LAI adrenergic                   | -0.845   | 0.997    |

Pairwise comparisons - Psychological Side Effects

|                           |                                  | W      | p     |
|---------------------------|----------------------------------|--------|-------|
| serotonergic/dopaminergic | LAI<br>serotonergic/dopaminergic | -1.427 | 0.952 |
| dopaminergic              | LAI muscarinic                   | 2.023  | 0.786 |
| dopaminergic              | LAI adrenergic                   | 1.800  | 0.865 |
| dopaminergic              | LAI<br>serotonergic/dopaminergic | 2.184  | 0.718 |
| LAI muscarinic            | LAI adrenergic                   | -0.167 | 1.000 |
| LAI muscarinic            | LAI<br>serotonergic/dopaminergic | 0.438  | 1.000 |
| LAI adrenergic            | LAI<br>serotonergic/dopaminergic | 0.214  | 1.000 |

Pairwise comparisons - Neurological Side Effects

|                           |                                  | W       | p     |
|---------------------------|----------------------------------|---------|-------|
| muscarinic                | adrenergic                       | -1.2332 | 0.977 |
| muscarinic                | serotonergic/dopaminergic        | -0.7499 | 0.998 |
| muscarinic                | dopaminergic                     | 0.3130  | 1.000 |
| muscarinic                | LAI muscarinic                   | -0.8496 | 0.997 |
| muscarinic                | LAI adrenergic                   | -0.3874 | 1.000 |
| muscarinic                | LAI<br>serotonergic/dopaminergic | -1.8820 | 0.838 |
| adrenergic                | serotonergic/dopaminergic        | 0.3626  | 1.000 |
| adrenergic                | dopaminergic                     | 0.9752  | 0.993 |
| adrenergic                | LAI muscarinic                   | 0.4083  | 1.000 |
| adrenergic                | LAI adrenergic                   | 0.4391  | 1.000 |
| adrenergic                | LAI<br>serotonergic/dopaminergic | -0.8503 | 0.997 |
| serotonergic/dopaminergic | dopaminergic                     | 0.5289  | 1.000 |
| serotonergic/dopaminergic | LAI muscarinic                   | -0.1094 | 1.000 |
| serotonergic/dopaminergic | LAI adrenergic                   | 0.0394  | 1.000 |
| serotonergic/dopaminergic | LAI<br>serotonergic/dopaminergic | -1.0112 | 0.992 |
| dopaminergic              | LAI muscarinic                   | -0.6410 | 0.999 |
| dopaminergic              | LAI adrenergic                   | -0.7410 | 0.999 |
| dopaminergic              | LAI<br>serotonergic/dopaminergic | -1.2002 | 0.980 |
| LAI muscarinic            | LAI adrenergic                   | 0.0000  | 1.000 |
| LAI muscarinic            | LAI<br>serotonergic/dopaminergic | -1.0556 | 0.990 |
| LAI adrenergic            | LAI<br>serotonergic/dopaminergic | -0.9715 | 0.993 |

## Pairwise comparisons - Autonomic Side Effects

|                           |                                  | W      | p     |
|---------------------------|----------------------------------|--------|-------|
| muscarinic                | adrenergic                       | -2.644 | 0.501 |
| muscarinic                | serotonergic/dopaminergic        | -2.156 | 0.730 |
| muscarinic                | dopaminergic                     | -1.544 | 0.931 |
| muscarinic                | LAI muscarinic                   | -4.247 | 0.043 |
| muscarinic                | LAI adrenergic                   | -2.696 | 0.476 |
| muscarinic                | LAI<br>serotonergic/dopaminergic | -2.675 | 0.486 |
| adrenergic                | serotonergic/dopaminergic        | 0.693  | 0.999 |
| adrenergic                | dopaminergic                     | -1.052 | 0.990 |
| adrenergic                | LAI muscarinic                   | -2.488 | 0.576 |
| adrenergic                | LAI adrenergic                   | -1.640 | 0.909 |
| adrenergic                | LAI<br>serotonergic/dopaminergic | -0.208 | 1.000 |
| serotonergic/dopaminergic | dopaminergic                     | -1.347 | 0.964 |
| serotonergic/dopaminergic | LAI muscarinic                   | -2.969 | 0.353 |
| serotonergic/dopaminergic | LAI adrenergic                   | -1.925 | 0.823 |
| serotonergic/dopaminergic | LAI<br>serotonergic/dopaminergic | -0.783 | 0.998 |
| dopaminergic              | LAI muscarinic                   | 0.000  | 1.000 |
| dopaminergic              | LAI adrenergic                   | -0.720 | 0.999 |
| dopaminergic              | LAI<br>serotonergic/dopaminergic | 0.859  | 0.997 |
| LAI muscarinic            | LAI adrenergic                   | -0.449 | 1.000 |
| LAI muscarinic            | LAI<br>serotonergic/dopaminergic | 2.064  | 0.769 |
| LAI adrenergic            | LAI<br>serotonergic/dopaminergic | 1.393  | 0.957 |

## Pairwise comparisons - Other side effects

|                           |                                  | W      | p     |
|---------------------------|----------------------------------|--------|-------|
| muscarinic                | adrenergic                       | -2.009 | 0.791 |
| muscarinic                | serotonergic/dopaminergic        | -0.199 | 1.000 |
| muscarinic                | dopaminergic                     | -1.311 | 0.968 |
| muscarinic                | LAI muscarinic                   | -3.021 | 0.331 |
| muscarinic                | LAI adrenergic                   | -2.735 | 0.458 |
| muscarinic                | LAI<br>serotonergic/dopaminergic | -1.162 | 0.983 |
| adrenergic                | serotonergic/dopaminergic        | 1.903  | 0.830 |
| adrenergic                | dopaminergic                     | -1.057 | 0.990 |
| adrenergic                | LAI muscarinic                   | -2.826 | 0.416 |
| adrenergic                | LAI adrenergic                   | -2.119 | 0.746 |
| adrenergic                | LAI<br>serotonergic/dopaminergic | 0.610  | 1.000 |
| serotonergic/dopaminergic | dopaminergic                     | -1.344 | 0.964 |
| serotonergic/dopaminergic | LAI muscarinic                   | -3.558 | 0.154 |
| serotonergic/dopaminergic | LAI adrenergic                   | -3.235 | 0.250 |

Pairwise comparisons - Other side effects

|                           |                                  | W      | p     |
|---------------------------|----------------------------------|--------|-------|
| serotonergic/dopaminergic | LAI<br>serotonergic/dopaminergic | -0.999 | 0.992 |
| dopaminergic              | LAI muscarinic                   | -0.633 | 0.999 |
| dopaminergic              | LAI adrenergic                   | 0.000  | 1.000 |
| dopaminergic              | LAI<br>serotonergic/dopaminergic | 1.046  | 0.990 |
| LAI muscarinic            | LAI adrenergic                   | -0.340 | 1.000 |
| LAI muscarinic            | LAI<br>serotonergic/dopaminergic | 2.430  | 0.604 |
| LAI adrenergic            | LAI<br>serotonergic/dopaminergic | 2.142  | 0.736 |

Pairwise comparisons - Sexual Side Effects

|                           |                                  | W      | p     |
|---------------------------|----------------------------------|--------|-------|
| muscarinic                | adrenergic                       | -1.250 | 0.975 |
| muscarinic                | serotonergic/dopaminergic        | 0.760  | 0.998 |
| muscarinic                | dopaminergic                     | 0.315  | 1.000 |
| muscarinic                | LAI muscarinic                   | -2.586 | 0.529 |
| muscarinic                | LAI adrenergic                   | -2.455 | 0.592 |
| muscarinic                | LAI<br>serotonergic/dopaminergic | -0.718 | 0.999 |
| adrenergic                | serotonergic/dopaminergic        | 1.772  | 0.873 |
| adrenergic                | dopaminergic                     | 1.175  | 0.982 |
| adrenergic                | LAI muscarinic                   | -1.941 | 0.817 |
| adrenergic                | LAI adrenergic                   | -1.900 | 0.832 |
| adrenergic                | LAI<br>serotonergic/dopaminergic | 0.288  | 1.000 |
| serotonergic/dopaminergic | dopaminergic                     | 0.208  | 1.000 |
| serotonergic/dopaminergic | LAI muscarinic                   | -2.884 | 0.390 |
| serotonergic/dopaminergic | LAI adrenergic                   | -2.635 | 0.505 |
| serotonergic/dopaminergic | LAI<br>serotonergic/dopaminergic | -1.199 | 0.980 |
| dopaminergic              | LAI muscarinic                   | -1.588 | 0.921 |
| dopaminergic              | LAI adrenergic                   | -1.972 | 0.805 |
| dopaminergic              | LAI<br>serotonergic/dopaminergic | -0.505 | 1.000 |
| LAI muscarinic            | LAI adrenergic                   | -0.263 | 1.000 |
| LAI muscarinic            | LAI<br>serotonergic/dopaminergic | 1.340  | 0.965 |
| LAI adrenergic            | LAI<br>serotonergic/dopaminergic | 1.588  | 0.921 |

Pairwise comparisons - WHODAS Total score

|                           |                                  | W      | p     |
|---------------------------|----------------------------------|--------|-------|
| muscarinic                | adrenergic                       | 0.665  | 0.999 |
| muscarinic                | serotonergic/dopaminergic        | 0.408  | 1.000 |
| muscarinic                | dopaminergic                     | -2.224 | 0.700 |
| muscarinic                | LAI muscarinic                   | -1.807 | 0.863 |
| muscarinic                | LAI adrenergic                   | -1.516 | 0.936 |
| muscarinic                | LAI<br>serotonergic/dopaminergic | -0.443 | 1.000 |
| adrenergic                | serotonergic/dopaminergic        | -0.263 | 1.000 |
| adrenergic                | dopaminergic                     | -2.170 | 0.724 |
| adrenergic                | LAI muscarinic                   | -2.352 | 0.641 |
| adrenergic                | LAI adrenergic                   | -1.910 | 0.828 |
| adrenergic                | LAI<br>serotonergic/dopaminergic | -0.851 | 0.997 |
| serotonergic/dopaminergic | dopaminergic                     | -2.353 | 0.641 |
| serotonergic/dopaminergic | LAI muscarinic                   | -2.431 | 0.603 |
| serotonergic/dopaminergic | LAI adrenergic                   | -2.057 | 0.772 |
| serotonergic/dopaminergic | LAI<br>serotonergic/dopaminergic | -0.716 | 0.999 |
| dopaminergic              | LAI muscarinic                   | 1.382  | 0.959 |
| dopaminergic              | LAI adrenergic                   | 1.414  | 0.954 |
| dopaminergic              | LAI<br>serotonergic/dopaminergic | 1.793  | 0.867 |
| LAI muscarinic            | LAI adrenergic                   | -0.386 | 1.000 |
| LAI muscarinic            | LAI<br>serotonergic/dopaminergic | 1.404  | 0.956 |
| LAI adrenergic            | LAI<br>serotonergic/dopaminergic | 1.557  | 0.928 |

Pairwise comparisons – Cognition

|                           |                                  | W       | p     |
|---------------------------|----------------------------------|---------|-------|
| muscarinic                | adrenergic                       | 0.6122  | 1.000 |
| muscarinic                | serotonergic/dopaminergic        | 0.8771  | 0.996 |
| muscarinic                | dopaminergic                     | -2.0165 | 0.788 |
| muscarinic                | LAI muscarinic                   | -1.1847 | 0.981 |
| muscarinic                | LAI adrenergic                   | -1.0577 | 0.990 |
| muscarinic                | LAI<br>serotonergic/dopaminergic | -0.7595 | 0.998 |
| adrenergic                | serotonergic/dopaminergic        | 0.0147  | 1.000 |
| adrenergic                | dopaminergic                     | -1.9950 | 0.797 |
| adrenergic                | LAI muscarinic                   | -1.4083 | 0.955 |
| adrenergic                | LAI adrenergic                   | -1.4919 | 0.941 |
| adrenergic                | LAI<br>serotonergic/dopaminergic | -1.1814 | 0.981 |
| serotonergic/dopaminergic | dopaminergic                     | -2.3760 | 0.630 |
| serotonergic/dopaminergic | LAI muscarinic                   | -1.5729 | 0.925 |
| serotonergic/dopaminergic | LAI adrenergic                   | -1.4567 | 0.947 |

Pairwise comparisons – Cognition

|                           |                                  | W       | p     |
|---------------------------|----------------------------------|---------|-------|
| serotonergic/dopaminergic | LAI<br>serotonergic/dopaminergic | -1.5142 | 0.937 |
| dopaminergic              | LAI muscarinic                   | 0.7727  | 0.998 |
| dopaminergic              | LAI adrenergic                   | 0.7201  | 0.999 |
| dopaminergic              | LAI<br>serotonergic/dopaminergic | 2.0240  | 0.785 |
| LAI muscarinic            | LAI adrenergic                   | -0.6664 | 0.999 |
| LAI muscarinic            | LAI<br>serotonergic/dopaminergic | 0.6384  | 0.999 |
| LAI adrenergic            | LAI<br>serotonergic/dopaminergic | 0.5733  | 1.000 |

Pairwise comparisons - Mobility

|                           |                                  | W      | p     |
|---------------------------|----------------------------------|--------|-------|
| muscarinic                | adrenergic                       | 0.703  | 0.999 |
| muscarinic                | serotonergic/dopaminergic        | -0.251 | 1.000 |
| muscarinic                | dopaminergic                     | -1.232 | 0.977 |
| muscarinic                | LAI muscarinic                   | -1.401 | 0.956 |
| muscarinic                | LAI adrenergic                   | -1.375 | 0.960 |
| muscarinic                | LAI<br>serotonergic/dopaminergic | -0.494 | 1.000 |
| adrenergic                | serotonergic/dopaminergic        | -1.492 | 0.941 |
| adrenergic                | dopaminergic                     | -1.611 | 0.916 |
| adrenergic                | LAI muscarinic                   | -1.749 | 0.880 |
| adrenergic                | LAI adrenergic                   | -1.705 | 0.892 |
| adrenergic                | LAI<br>serotonergic/dopaminergic | -1.481 | 0.943 |
| serotonergic/dopaminergic | dopaminergic                     | -2.000 | 0.795 |
| serotonergic/dopaminergic | LAI muscarinic                   | -1.442 | 0.950 |
| serotonergic/dopaminergic | LAI adrenergic                   | -1.318 | 0.968 |
| serotonergic/dopaminergic | LAI<br>serotonergic/dopaminergic | 0.000  | 1.000 |
| dopaminergic              | LAI muscarinic                   | 0.621  | 0.999 |
| dopaminergic              | LAI adrenergic                   | 0.360  | 1.000 |
| dopaminergic              | LAI<br>serotonergic/dopaminergic | 1.625  | 0.913 |
| LAI muscarinic            | LAI adrenergic                   | -0.167 | 1.000 |
| LAI muscarinic            | LAI<br>serotonergic/dopaminergic | 1.082  | 0.988 |
| LAI adrenergic            | LAI<br>serotonergic/dopaminergic | 1.037  | 0.991 |

Pairwise comparisons – Self-care

|                           |                                  | W      | p     |
|---------------------------|----------------------------------|--------|-------|
| muscarinic                | adrenergic                       | 0.508  | 1.000 |
| muscarinic                | serotonergic/dopaminergic        | 1.839  | 0.852 |
| muscarinic                | dopaminergic                     | -2.245 | 0.691 |
| muscarinic                | LAI muscarinic                   | -0.546 | 1.000 |
| muscarinic                | LAI adrenergic                   | -1.865 | 0.844 |
| muscarinic                | LAI<br>serotonergic/dopaminergic | 0.359  | 1.000 |
| adrenergic                | serotonergic/dopaminergic        | 0.657  | 0.999 |
| adrenergic                | dopaminergic                     | -2.030 | 0.783 |
| adrenergic                | LAI muscarinic                   | -0.887 | 0.996 |
| adrenergic                | LAI adrenergic                   | -1.914 | 0.827 |
| adrenergic                | LAI<br>serotonergic/dopaminergic | -0.259 | 1.000 |
| serotonergic/dopaminergic | dopaminergic                     | -2.409 | 0.614 |
| serotonergic/dopaminergic | LAI muscarinic                   | -1.334 | 0.966 |
| serotonergic/dopaminergic | LAI adrenergic                   | -2.141 | 0.737 |
| serotonergic/dopaminergic | LAI<br>serotonergic/dopaminergic | -1.229 | 0.977 |
| dopaminergic              | LAI muscarinic                   | 1.580  | 0.923 |
| dopaminergic              | LAI adrenergic                   | 0.882  | 0.996 |
| dopaminergic              | LAI<br>serotonergic/dopaminergic | 2.223  | 0.701 |
| LAI muscarinic            | LAI adrenergic                   | -1.033 | 0.991 |
| LAI muscarinic            | LAI<br>serotonergic/dopaminergic | 0.595  | 1.000 |
| LAI adrenergic            | LAI<br>serotonergic/dopaminergic | 1.812  | 0.861 |

Pairwise comparisons – Getting along

|                           |                                  | W       | p     |
|---------------------------|----------------------------------|---------|-------|
| muscarinic                | adrenergic                       | 0.8365  | 0.997 |
| muscarinic                | serotonergic/dopaminergic        | 1.0312  | 0.991 |
| muscarinic                | dopaminergic                     | -1.9701 | 0.806 |
| muscarinic                | LAI muscarinic                   | -2.0800 | 0.763 |
| muscarinic                | LAI adrenergic                   | -0.0297 | 1.000 |
| muscarinic                | LAI<br>serotonergic/dopaminergic | 1.1000  | 0.987 |
| adrenergic                | serotonergic/dopaminergic        | 0.0149  | 1.000 |
| adrenergic                | dopaminergic                     | -1.8212 | 0.858 |
| adrenergic                | LAI muscarinic                   | -2.2260 | 0.699 |
| adrenergic                | LAI adrenergic                   | -0.3225 | 1.000 |
| adrenergic                | LAI<br>serotonergic/dopaminergic | -0.0559 | 1.000 |
| serotonergic/dopaminergic | dopaminergic                     | -2.1964 | 0.713 |
| serotonergic/dopaminergic | LAI muscarinic                   | -2.5117 | 0.564 |
| serotonergic/dopaminergic | LAI adrenergic                   | -0.3097 | 1.000 |



Pairwise comparisons – Getting along

|                           |                                  | W      | p     |
|---------------------------|----------------------------------|--------|-------|
| serotonergic/dopaminergic | LAI<br>serotonergic/dopaminergic | 0.1641 | 1.000 |
| dopaminergic              | LAI muscarinic                   | 0.3128 | 1.000 |
| dopaminergic              | LAI adrenergic                   | 0.7201 | 0.999 |
| dopaminergic              | LAI<br>serotonergic/dopaminergic | 1.8241 | 0.857 |
| LAI muscarinic            | LAI adrenergic                   | 0.7307 | 0.999 |
| LAI muscarinic            | LAI<br>serotonergic/dopaminergic | 2.1464 | 0.735 |
| LAI adrenergic            | LAI<br>serotonergic/dopaminergic | 0.6095 | 1.000 |

Pairwise comparisons – Life activities

|                           |                                  | W      | p     |
|---------------------------|----------------------------------|--------|-------|
| muscarinic                | adrenergic                       | 0.776  | 0.998 |
| muscarinic                | serotonergic/dopaminergic        | -0.163 | 1.000 |
| muscarinic                | dopaminergic                     | -2.392 | 0.622 |
| muscarinic                | LAI muscarinic                   | -1.483 | 0.943 |
| muscarinic                | LAI adrenergic                   | -1.698 | 0.894 |
| muscarinic                | LAI<br>serotonergic/dopaminergic | -1.740 | 0.883 |
| adrenergic                | serotonergic/dopaminergic        | -1.065 | 0.989 |
| adrenergic                | dopaminergic                     | -2.287 | 0.671 |
| adrenergic                | LAI muscarinic                   | -1.751 | 0.879 |
| adrenergic                | LAI adrenergic                   | -2.136 | 0.739 |
| adrenergic                | LAI<br>serotonergic/dopaminergic | -2.466 | 0.587 |
| serotonergic/dopaminergic | dopaminergic                     | -2.401 | 0.618 |
| serotonergic/dopaminergic | LAI muscarinic                   | -1.175 | 0.982 |
| serotonergic/dopaminergic | LAI adrenergic                   | -1.388 | 0.958 |
| serotonergic/dopaminergic | LAI<br>serotonergic/dopaminergic | -1.438 | 0.950 |
| dopaminergic              | LAI muscarinic                   | 1.576  | 0.924 |
| dopaminergic              | LAI adrenergic                   | 1.482  | 0.943 |
| dopaminergic              | LAI<br>serotonergic/dopaminergic | 2.002  | 0.794 |
| LAI muscarinic            | LAI adrenergic                   | -0.225 | 1.000 |
| LAI muscarinic            | LAI<br>serotonergic/dopaminergic | 0.220  | 1.000 |
| LAI adrenergic            | LAI<br>serotonergic/dopaminergic | 0.713  | 0.999 |

Pairwise comparisons – Participation in society

|                           |                                  | W       | p     |
|---------------------------|----------------------------------|---------|-------|
| muscarinic                | adrenergic                       | -0.1992 | 1.000 |
| muscarinic                | serotonergic/dopaminergic        | 0.7962  | 0.998 |
| muscarinic                | dopaminergic                     | -1.3083 | 0.969 |
| muscarinic                | LAI muscarinic                   | -1.9951 | 0.797 |
| muscarinic                | LAI adrenergic                   | -2.0463 | 0.776 |
| muscarinic                | LAI<br>serotonergic/dopaminergic | -0.0585 | 1.000 |
| adrenergic                | serotonergic/dopaminergic        | 0.7052  | 0.999 |
| adrenergic                | dopaminergic                     | -1.6158 | 0.915 |
| adrenergic                | LAI muscarinic                   | -2.5388 | 0.551 |
| adrenergic                | LAI adrenergic                   | -1.9542 | 0.812 |
| adrenergic                | LAI<br>serotonergic/dopaminergic | 0.0276  | 1.000 |
| serotonergic/dopaminergic | dopaminergic                     | -1.9676 | 0.807 |
| serotonergic/dopaminergic | LAI muscarinic                   | -2.7614 | 0.446 |
| serotonergic/dopaminergic | LAI adrenergic                   | -2.4942 | 0.573 |
| serotonergic/dopaminergic | LAI<br>serotonergic/dopaminergic | -0.6900 | 0.999 |
| dopaminergic              | LAI muscarinic                   | -0.4609 | 1.000 |
| dopaminergic              | LAI adrenergic                   | 0.0000  | 1.000 |
| dopaminergic              | LAI<br>serotonergic/dopaminergic | 1.2307  | 0.977 |
| LAI muscarinic            | LAI adrenergic                   | -0.3868 | 1.000 |
| LAI muscarinic            | LAI<br>serotonergic/dopaminergic | 2.0404  | 0.779 |
| LAI adrenergic            | LAI<br>serotonergic/dopaminergic | 2.0915  | 0.758 |
